# Supplementary material for: Bid maintains mitochondrial cristae structure and function and protects against cardiac disease in an integrative genomics study
Source: eLife. 2018 Oct 3;7:e40907. doi: 10.7554/eLife.40907 (PMC6234033; doi:10.7554/eLife.40907)
Supplement: Figure 2—source data 1. [file elife-40907-fig2-data1.xlsx]

## Sheet: Figure 2
Figure 2C	EM Quantitation Avg. Length Density (Cristae/mitochondria)							Figure 2D	EM Quantitation Avg. Area Density (Mitochondria/cell)
	Cell Type (MPCs)								Cell Type (MPCs)
Image #	Bid+/+	Bid-/-	Bid-/- + FHA-Bid	Bid-/- + FHA-BidBH3	Bid-/- + FHA-BidD59A			Image #	Bid+/+	Bid-/-	Bid-/- + FHA-Bid	Bid-/- + FHA-BidBH3	Bid-/- + FHA-BidD59A
1	0.0110681	0.022	0	0.031746	0.030303			1	0.08125	0.103226	0.0764706	0.0268456	0.103286
2	0.016444	0.0186667	0.00787402	0.0176367	0.031746			2	0.076087	0.139535	0.137931	0.125	0.203704
3	0.0151458	0.00213333	0	0.0204082	0.0154195			3	0.246753	0.110294	0	0.189189	0.204678
4	0.020555	0.0096	0.015748	0.010582	0.0357143			4	0.106061	0.0813008	0.103896	0.0365854	0.113475
5	0.02494	0.0145455	0.00926355	0.020202	0.0367586			5	0.114504	0.0852713	0.131783	0.100917	0.168224
6	0.115108	0.01408	0.00449944	0.015361	0.0183793			6	0.0285714	0.280899	0.162791	0.316327	0.134328
7	0.0359712	0.012	0.00224972	0.021164	0.017412			7	0.109091	0.196319	0.164706	0.131579	0.129252
8	0.0383693	0.00888889	0.00449944	0.0207039	0.0265369			8	0.0379747	0.216867	0.0538462	0.160839	0.204819
9	0.0181749	0.0209231	0.00899888	0.023088	0.0260652			9	0.180952	0.0860927	0.16092	0.141026	0.144231
10	0.00719424	0.008	0.00885827	0.0252101	0.0274973			10	0.336449	0.045977	0.16	0.197674	0.294118
11	0.022446	0.016	0.0121139	0.00865801	0.0313828			11	0.320513	0.0545455	0.0783133	0.127907	0.150327
12	0.0209287	0.01152	0.00741084	0.0250627	0.027927			12	0.127907	0.145349	0.138211	0.123377	0.0818713
13	0.028777	0.00933333	0.00449944	0.0200501	0.0334169			13	0.127273	0.149068	0.189189	0.136691	0.183673
14	0.0479616	0	0.0100215	0.030303	0.00668338			14	0.0895522	0	0.134969	0.209524	0.0471204
15	0.0174717	0.0250435	0.0314961	0.010582	0.0208213			15	0.337349	0.148387	0.0842105	0.100671	0.126214
16	0.0179856	0.0192	0.0275591	0.0117914	0.0195489			16	0.153846	0.0561798	0.111111	0.225806	0.183486
17	0.0235448	0.0133333	0.00331538	0.031746	0.0159222			17	0.15942	0.0875912	0.111765	0.0130719	0.151786
18	0.0234914	0.0064	0.0243379	0.0198413	0.0236305			18	0.281609	0.0925926	0.125	0.164948	0.259259
19	0.028777	0.0248889	0.00699913	0.02442	0.0178412			19	0.060241	0.189474	0.0947368	0.0962963	0.30102
20	0.0221361	0	0.0131234	0.015873	0.0150376			20	0.236364	0.02	0.146341	0.0727273	0.127168
21	0.0191847	0.00417391	0.0115674	0.0252101	0.0398054			21	0.12	0.175573	0.0962963	0.201183	0.409639
22	0.0232956	0.0172308	0	0.015873	0.027927			22	0.181034	0.114035	0.0479452	0.0447761	0.434109
23	0.0340092	0.0032	0.0100251	0.031746	0.0165414			23	0.1	0.0840336	0.103448	0.0340909	0.121951
24	0.0278487	0.00533333	0	0.026862	0.0205275			24	0.238462	0.0384615	0.037037	0.149425	0.333333
25	0.0143885	0	0.0386473	0.026225	0.0203211			25	0.0131579	0	0.123288	0.227723	0.218935
26	0.0255795	0.0172308	0.00445931	0.021164	0.018797			26	0.113924	0.077381	0.119266	0.241071	0.210526
27	0.02494	0.0186667	0.00181159	0.031746	0.0268528			27	0.178571	0.0727273	0.175824	0.0127389	0.14359
28	0.0175859	0.00738462	0	0.0181406	0.0294069			28	0.214286	0.24375	0.157407	0.16092	0.486486
29	0.0306954	0.00564706	0.00362319	0.0168862	0.016657			29	0.166667	0.133858	0.0310078	0.382114	0.419355
30	0.0274066	0.0128	0.0158103	0.0330159	0.0194604			30	0.154412	0.0458716	0.0614525	0.167785	0.333333
31	0.0300282	0.032	0.0120773	0.0185185	0.0183066			31	0.164286	0.0470588	0.0991736	0.173913	0.367021
32	0.0143885	0	0.00362319	0.0136054	0.0285714			32	0.233333	0	0.0769231	0.0608696	0.176991
33	0.0104644	0.0166957	0	0.0281385	0.0170162			33	0.11	0.142857	0.111111	0.382609	0.5
34	0.0125117	0.0213333	0	0.0408163	0.0240602			34	0.209091	0.046875	0.0314136	0.0457516	0.263158
35	0.0172662	0	0.00724638	0.017316	0.0229987			35	0.0510204	0.00847458	0.25	0.180328	0.22973
36	0.0177089	0.0116923	0.0217391	0.020202	0.0292623			36	0.134021	0.374101	0.20202	0.126437	0.445783
37	0.028777	0.0261818	0.0144928	0.0507937	0.00334169			37	0.130435	0.0728477	0.215385	0.128205	0.0865385
38	0.0130804	0.0142222	0	0.00976801	0.0115674			38	0.166667	0.103448	0.0862069	0.142857	0.0921986
39	0.0239808	0.0177778	0.0270677	0.0129336	0.0150376			39	0.185567	0.222222	0.15873	0.16875	0.365079
40	0.0258	0.0124444	0.0200501	0.0349206	0.0112782			40	0.208633	0.105263	0.12963	0.175439	0.0816327

## Sheet: Figure 2- Figure Supplement 1
Figure 2-Figure Supplement 1A	MPC Growth Rates (Number of cells)
Bid+/+ MPCs	Time (hours)
Replicates	0	24	48	72	96
1	250000	665000	1130000	1180000	1680000
2	250000	540000	815000	1805000	1875000
3	250000	535000	1265000	1935000	2190000
4	250000	480000	1290000	1770000	1650000
Bid-/- MPCs	Time (hours)
Replicates	0	24	48	72	96
1	250000	340000	745000	940000	690000
2	250000	645000	765000	1005000	1045000
3	250000	415000	575000	875000	1160000
4	250000	490000	1050000	1230000	1530000
Figure 2-Figure Supplement 1B	% BrdU Postive Cells
Replicates	Bid+/+	Bid -/-
1	46.4	42.8
2	57.3	49.9
3	56.3	51.6
Figure 2-Figure Supplement 1C	Percent Viable (%) Normalized
Bid+/+ MPCs	Time (hours)
Replicates	0	6	12	24
1	97.35	97.09	98.1	96.88
2	98.14	98.1	95.71	96.19
3	97.76	98.11	97.23	97.27
4	97.94	97.66	97.53	97.53
5	97.65	96.78	97.599	98.66
6	97.58	97.12	97.49	95.39
7	96.4	97.9	97.15	95.12
	Percent Viable (%) Normalized
Bid-/- MPCs	Time (hours)
Replicates	0	6	12	24
1	94.98	95.43	96.73	92.86
2	91.5	92.63	92.17	91
3	96.51	95.88	96.04	92.7
4	95.89	95.28	93.3	93.97
5	97.766	97.456	98.05	97.33
6	95.77	95.3	95.55	91.95
7	94.61	95.16	95.58	94.53
