# Supplementary material for: Bid maintains mitochondrial cristae structure and function and protects against cardiac disease in an integrative genomics study
Source: eLife. 2018 Oct 3;7:e40907. doi: 10.7554/eLife.40907 (PMC6234033; doi:10.7554/eLife.40907)
Supplement: Figure 4—source data 1. [file elife-40907-fig4-data1.xlsx]

## Sheet: Figure 4
Figure 4B	Average Cristae Width (nm) (top graph)					Cristae width (%) (bottom graph)						Figure 4C	Echocardiogram LVIDd (mm)
	Mouse (genotype) & treatment						Mouse (genotype) & treatment						Baseline		Stress (18 hours post-Epi)		Recovery (5 days post-Epi)
Measurement #	Bid+/+	Bid+/+ + Epi	Bid -/-	Bid-/- + Epi		Cristae width	Bid+/+	Bid+/+ + Epi	Bid -/-	Bid-/- + Epi		# of mice	Bid+/+	Bid -/-	Bid+/+	Bid -/-	Bid+/+	Bid -/-
1	7.954	7.954	10.096	14.061		7-20 nm	57.3333	54.6667	23.3333	4.66667		1	3.28	3.47	3.69333	4.46	4.36	4.5
2	8.893	8.893	10.606	17.285		20-30 nm	30	28	34	22.6667		2	3.07333	3.22667	4.08	4.51	3.98	3.46333
3	10.14	9.374	11.858	17.687		30-45 nm	10.6667	11.3333	22.6667	22.6667		3	3.24333	3.32	3.49	4.46	3.21	3.25667
4	10.606	9.374	13.257	17.786		> 45 nm	2	6	20	50		4	3.42333	3.1	4.06667	4.07	3.31333	4.11
5	10.932	9.374	13.52	17.786								5	3.52333	3.08667	3.87333	4.91	3.34	3.15
6	10.932	10.096	13.52	18.749								6	3.15667	3.94333	3.8	3.65		3.25667
7	10.932	10.096	13.649	19.886								7	3.1	3.25667	4.25333	4.53667
8	11.249	10.606	14.061	20.28								8	3.67333	3.14667	4.09667	4.12
9	12.005	10.932	14.643	20.961								9	3.75333	3.16	4.22	4.13667
10	12.005	10.932	14.643	21.965								10	3.61667	4.23	3.83	3.79
11	12.005	10.932	15.116	21.965								11	3.59	3.65	3.89667
12	12.005	11.249	15.46	22.576								12	3.64667	3.43333	3.76667
13	12.005	11.249	15.909	24.01
14	12.005	11.249	15.909	24.192								Figure 4D	Echocardiogram LVIDs (mm)
15	12.005	11.595	15.909	25.154
16	12.005	11.595	16.128	25.154									Baseline		Stress (18 hours post-Epi)		Recovery (5 days post-Epi)
17	12.005	11.595	16.769	25.154								# of mice	Bid+/+	Bid -/-	Bid+/+	Bid -/-	Bid+/+	Bid -/-
18	12.577	11.858	16.769	25.154								1	1.78333	2.07667	2.93	3.88	2.73333	2.68
19	12.577	11.931	16.769	25.224								2	1.91667	1.73	3.35667	4.05333	2.15667	1.84
20	12.577	12.005	16.769	25.928								3	1.76	1.97333	2.67	3.93	1.71	1.99667
21	12.577	12.577	16.874	25.928								4	2.17333	1.91	3.25333	2.61	1.48333	2.53
22	13.257	13.124	17.285	25.928								5	2.1	2.12333	2.17	3.52667	2.01667	2
23	13.52	13.124	17.285	26.046								6	2.05	2.97	2.48	2.15		1.86667
24	13.52	13.124	17.285	26.114								7	1.78	1.81	3.48	3.58333
25	13.52	13.257	17.687	26.514								8	2.73333	2.03333	2.32	3.13667
26	13.52	13.52	17.687	26.531								9	2.04667	1.86667	3.21667	2.58333
27	13.649	13.52	17.687	26.68								10	2.01667	2.49	2.6	3.79
28	14.061	13.649	17.786	27.298								11	2.24	2.15	2.61333
29	14.061	14.061	17.786	27.298								12	1.79333	2.16667	2.64333
30	14.278	14.061	17.786	27.872
31	14.278	14.061	18.465	28.123								Figure 4E	Echocardiogram Ejection fraction (%)
32	14.278	14.278	18.56	28.123									Baseline		Stress (18 hours post-Epi)		Recovery (5 days post-Epi)
33	14.34	14.278	18.749	28.123								# of mice	Bid+/+	Bid -/-	Bid+/+	Bid -/-	Bid+/+	Bid -/-
34	14.673	14.643	19.93	28.123								1	83.9278	78.5656	50.0716	34.1599	75.3613	78.8765
35	14.999	14.643	19.93	29.286								2	75.7445	84.5874	44.3142	27.4049	84.0889	85.0042
36	15.116	14.643	20.193	29.361								3	84.0205	79.0016	55.2227	31.5816	84.8827	76.9539
37	15.116	14.999	20.193	29.644								4	74.4123	76.6108	48.8	17.0599	91.0273	76.6742
38	15.116	15.116	20.28	29.644								5	78.8263	67.4474	82.4157	42.087	77.9878	74.4048
39	15.116	15.116	20.28	29.895								6	72.611	57.2753	72.2026	9.53608		81.1687
40	15.116	15.116	20.708	29.895								7	81.0689	82.8322	45.2292	44.1485
41	15.116	15.116	21.377	29.895								8	58.8	73.018	81.8376	54.4502
42	15.145	15.116	21.377	30.231								9	83.786	79.3871	55.7125	56.4033
43	15.145	15.116	21.377	30.419								10	82.6629	79.6025	68.7159	68.3318
44	15.46	15.145	21.864	31.063								11	75.7081	79.5621	69.8349
45	15.46	15.375	21.965	31.204								12	88.1069	74.8679	65.4392
46	15.909	15.46	22.576	31.817
47	15.909	15.46	23.715	31.817								Figure 4F	Echocardiogram End Diastolic Volume (μl)
48	15.909	15.909	23.863	31.817									Baseline		Stress (18 hours post-Epi)		Recovery (5 days post-Epi)
49	15.909	15.909	23.863	31.873								# of mice	Bid+/+	Bid -/-	Bid+/+	Bid -/-	Bid+/+	Bid -/-
50	15.909	15.909	24.01	31.873								1	33.8591	40.0906	48.3404	85.1254	79.5269	87.4363
51	16.019	15.909	24.373	32.065								2	27.8537	32.2342	65.1681	88.0205	60.4928	39.86
52	16.128	16.128	24.445	32.065								3	32.7363	35.1131	40.7878	85.1254	31.7373	33.1417
53	16.128	16.128	24.445	32.092								4	38.4948	28.5851	64.5313	64.6901	34.902	66.6162
54	16.128	16.371	25.154	33.538								5	41.9677	28.2178	9.80468	113.579	35.7515	29.9907
55	16.128	16.398	25.154	33.538								6	30.1815	58.8362	14.6356	46.6587		33.1417
56	16.398	16.398	25.224	33.864								7	28.5851	33.1417	40.4382	89.5911
57	16.398	16.769	25.224	34.213								8	47.5593	29.8956	11.9817	67.1036
58	16.398	16.874	25.501	34.469								9	50.7348	30.2772	72.1094	67.9213
59	16.769	16.874	25.928	34.571								10	45.3921	72.6232	53.9077	52.2363
60	16.874	16.9	26.114	34.786								11	44.3954	46.6587	56.772
61	16.9	17.285	26.248	35.375								12	46.531	38.8331	51.2774
62	17.106	17.285	26.248	35.672
63	17.285	17.285	26.514	36.015
64	17.285	17.285	26.514	36.064								Figure 4G	Echocardiogram End Systolic Volume (μl)
65	17.285	17.285	26.514	38.251									Baseline		Stress (18 hours post-Epi)		Recovery (5 days post-Epi)
66	17.285	17.285	26.844	39.069								# of mice	Bid+/+	Bid -/-	Bid+/+	Bid -/-	Bid+/+	Bid -/-
67	17.687	17.687	26.844	39.069								1	5.44192	8.5932	24.1356	56.0466	19.5944	18.4697
68	17.687	17.687	27.04	39.069								2	6.75607	4.96813	36.2893	63.8986	9.62506	5.97734
69	17.687	17.786	27.04	40.266								3	5.23109	7.3732	18.2637	58.2414	4.79781	7.63785
70	17.687	18.007	27.04	42.184								4	9.84994	6.68582	33.04	17.0599	3.13163	15.5387
71	17.786	18.007	27.04	42.506								5	8.88612	9.18563	9.80468	42.087	7.86967	7.67617
72	17.786	18.007	27.04	42.753								6	8.26639	25.1376	14.6356	9.53608		6.24101
73	18.465	18.007	27.682	43.658								7	5.41146	5.68971	40.4382	44.1485
74	18.465	18.56	27.872	43.889								8	19.5944	8.06641	11.9817	30.5655
75	18.465	18.865	27.872	44.996								9	8.22613	6.24101	31.9354	29.6114
76	18.56	18.865	27.872	45.385								10	7.86967	14.8133	16.8645	16.5423
77	18.56	19.12	28.123	47.891								11	10.7845	9.53608	17.1253
78	18.749	19.12	28.123	48.547								12	5.53398	9.75957	17.7219
79	18.749	19.303	28.123	49.498
80	18.749	19.303	28.185	50.027
81	18.749	19.886	28.185	50.482
82	18.749	19.93	28.185	50.482
83	18.749	20.193	28.68	51.856
84	18.842	20.193	29.286	51.856
85	19.574	20.28	29.346	52.311
86	19.93	20.28	29.644	53.095
87	20.193	20.28	30.056	54.095
88	20.28	20.28	30.231	54.605
89	20.28	20.474	30.289	55.395
90	20.623	21.212	30.52	55.467
91	20.708	21.212	30.52	56.246
92	20.708	21.377	31.034	57.359
93	20.708	21.418	31.428	57.39
94	20.961	21.965	32.365	57.703
95	20.961	21.965	32.743	57.703
96	21.212	21.965	33.538	58.151
97	21.377	22.498	33.799	58.211
98	21.864	22.576	34.418	60.382
99	21.864	22.576	34.571	60.578
100	21.864	22.654	35.573	61.041
101	21.864	22.654	35.672	61.5
102	21.965	22.673	35.819	61.87
103	22.576	22.828	35.819	62.125
104	22.809	22.886	35.819	62.884
105	22.886	24.01	36.403	63.198
106	23.191	24.192	37.52	63.198
107	23.285	24.192	37.684	63.198
108	23.863	24.373	37.731	63.69
109	24.01	25.224	37.835	63.759
110	24.192	25.224	38.651	64.648
111	25.224	25.466	39.727	64.744
112	25.928	25.501	39.783	64.974
113	25.928	25.501	40.255	65.593
114	26.114	25.501	40.386	65.834
115	26.114	25.928	41.119	66.498
116	26.114	25.928	41.247	66.762
117	26.844	26.248	41.923	68.484
118	26.991	26.514	42.132	68.835
119	27.04	26.514	43.929	69.167
120	27.682	27.698	44.996	69.458
121	27.682	28.263	45.771	69.572
122	27.682	29.286	46.115	69.856
123	28.123	29.286	46.871	70.307
124	28.123	29.895	47.8	70.979
125	28.123	30.056	48.746	70.979
126	28.185	30.056	49.498	73.023
127	28.372	33.17	51.482	73.119
128	28.68	33.222	51.703	73.335
129	29.644	34.328	53.359	73.503
130	29.998	34.328	54.403	73.527
131	29.998	36.56	54.661	73.819
132	30.056	36.56	54.757	74.246
133	30.231	36.56	56.316	74.642
134	30.289	36.978	58.241	74.724
135	30.52	37.497	58.602	75.578
136	30.52	37.684	59.125	76.134
137	31.817	38.606	60.025	77.223
138	31.817	41.417	60.12	77.981
139	32.092	41.502	61.87	78.794
140	32.256	41.808	61.934	79.394
141	33.747	42.928	62.125	80.531
142	33.968	46.806	64.744	80.972
143	34.469	49.195	64.927	83.046
144	34.469	49.195	68.02	83.615
145	36.209	49.754	73.023	85.717
146	36.403	50.308	73.173	86.039
147	42.423	51.627	79.643	92.838
148	45.308	53.507	81.991	96.195
149	46.909	66.998	82.759	99.429
150	47.891	67.495	99.866	112.069

## Sheet: Figure 4-figure supplement 3
Figure 4-Figure Supplement 1A	Echocardiogram Fractional shortening (%)
	Baseline		Stress (18 hours post-Epi)		Recovery (5 days post-Epi)
# of mice	Bid+/+	Bid -/-	Bid+/+	Bid -/-	Bid+/+	Bid -/-
1	45.6301	40.1537	20.6679	13.0045	37.3089	40.4444
2	37.6356	46.3843	17.7288	10.1256	45.8124	46.872
3	45.7348	40.5622	23.4957	11.8834	46.729	38.6899
4	36.5141	38.3871	20	35.872	55.2314	38.4428
5	40.3974	31.2095	43.9759	28.1738	39.6208	36.5079
6	35.0581	24.683	34.7368	41.0959		42.6817
7	42.5806	44.4217	18.1818	21.014
8	25.5898	35.3814	43.3686	23.0583
9	45.4707	40.9283	23.7757	24.1741
10	44.2396	41.1348	32.1149	31.8382
11	37.6045	41.0959	32.9341
12	50.8227	36.8932	29.823
Figure 4-Figure Supplement 1B	Heart weight/Body Weight (g)
# of mice	Bid+/+	Bid -/-
1	0.00493156	0.0060991
2	0.00629203	0.00537209
3	0.00541964	0.00451004
4	0.00466052	0.00782397
5	0.00450357	0.00558537
6	0.00515151	0.00505618
7	0.0048419	0.0044708
8	0.00452364	0.00379872
9	0.00502415	0.00502756
10	0.00532883	0.00659362
11	0.00751704
Figure 4-Figure Supplement 1C	Doxorubicin Fractional shortening (%)
# of mice	Bid+/+	Bid -/-
1	59.1887	46.6687
2	59.1959	48.0287
3	52.1729	44.4654
4	51.2991	46.7231
Figure 4-Figure Supplement 1D	Doxorubicin Ejection Fraction (%)
# of mice	Bid+/+	Bid -/-
1	89.5125	79.0141
2	89.9273	80.2253
3	84.1887	76.891
4	83.5522	79.0264
