# Supplementary material for: Bid maintains mitochondrial cristae structure and function and protects against cardiac disease in an integrative genomics study
Source: eLife. 2018 Oct 3;7:e40907. doi: 10.7554/eLife.40907 (PMC6234033; doi:10.7554/eLife.40907)
Supplement: Figure 5—source data 1. [file elife-40907-fig5-data1.xlsx]

## Sheet: Figure 5
Figure 5A	Baseline Trichrome postivity (%)			Figure 5B	Stress Trichrome postivity (%)			Figure 5C	Recovery Trichrome postivity (%)
# of mice	Bid+/+	Bid -/-		# of mice	Bid+/+	Bid -/-		# of mice	Bid+/+	Bid -/-
1	0.00816	0.582		1	0.396	0.724		1	0.530878	0.869707
2	0.646	0.196		2	0.182	0.82		2	0.451804	0.955202
3	0.119	0.0509		3	0.0312	0.481		3	0.883985	0.932237
				4	0.216			4	0.53034	0.781445
								5	0.493246	0.761414
								6	0.899323	0.804937
