# Supplementary material for: Bid maintains mitochondrial cristae structure and function and protects against cardiac disease in an integrative genomics study
Source: eLife. 2018 Oct 3;7:e40907. doi: 10.7554/eLife.40907 (PMC6234033; doi:10.7554/eLife.40907)
Supplement: Figure 6—source data 1. [file elife-40907-fig6-data1.xlsx]

## Sheet: Figure 6
Figure 6B	In-gel activity assay (Complex V) Dimer				In-gel activity assay (Complex V) Dimer/Monomer				In-gel activity assay (Complex V) Monomer
# of mice	Bid+/+	Bid -/-		# of mice	Bid+/+	Bid -/-		# of mice	Bid+/+	Bid -/-
1	6880.58	6643.7	(Arbritrary units)	1	0.52168	0.467064		1	13189.3	14224.4
2	6709.65	6256.58		2	0.602472	0.538888		2	11136.9	11610.1
3	6493.94	6508.53		3	0.593147	0.532327		3	10948.3	12226.6
4	6748.65	6026.87		4	0.504572	0.430984		4	13375	13984
Figure 6C	MPC oxygen consumption (OCR)
	MPC Cell Line
Replicates	Bid+/+	Bid-/-	Bid-/- + FHA-Bid	Bid-/- + FHA-BidBH3	Bid-/- + FHA-BidD59A
1	26.3	8.7	19.6	48.1	40.9
2	24.3	20.2	23.3	53.7	46.3
3	33	26.2	20	60.9	65.8
4	28.3	17.2	13.7
5	28.1	10.7
6	23.8	20.1
7	32.2	26.9
Figure 6D	LV heart fibers oxygen consumption (OCR)
# of mice	Bid+/+	Bid-/-
1	37.4841	14.8264
2	33.1465	19.6811
3	28.3269	9.10615
Figure 6E	JO2 LV Heart Fibers
	CI (GM + ADP)		Rotenone		CII (Rot + Succinate)
# of mice	Bid+/+	Bid-/-	Bid+/+	Bid-/-	Bid+/+	Bid-/-
1	41.9657	32.2858	14.4014	10.9427	103.051	70.1904
2	87.9456	17.8063	39.0692	14.3745	142.257	28.5836
3	37.2438	15.7635	15.7094	8.30477	63.768	35.2322
4	31.2251	36.7641	10.8967	20.5802	99.5902	72.4144
5	35.3458	25.0331	5.44732	17.9018	97.6404	42.63
6	29.2486	19.1611	10.777	13.0678	100.239	39.5905
Figure 6F	JATP LV Heart Fibers
	CI (GM + ADP)		Rotenone		CII (Rot + Succinate)
# of mice	Bid+/+	Bid-/-	Bid+/+	Bid-/-	Bid+/+	Bid-/-
1	387.329	219.841	77.2513	35.463	264.492	184.255
2	310.546	160.628	10.7058	28.2379	268.869	171.862
3	171.752	68.9212	18.2771	-23.2453	169.313	95.8523
4	140.998	190.276	22.7388	28.214	158.855	217.145
5	167.787	151.624	29.3921	0.953481	165.03	158.927
6	189.935	33.0808	52.2493	-1.83482	238.705	73.7192

## Sheet: Figure 6-figure supplement 1bc
Figure 6-Figure Supplement 1B (Table) and C (Heat map)
MudPIT of isolated mitochondria from Bid+/+ and Bid-/- MPCs							Significantly Different Proteins (Fisher's test, p<0.05) from MitoCarta 2.0 (54/548 proteins)
Hits cross referenced with MitoCarta 2.0 proteins (548 total proteins)									Spectral counts
Gene #	Gene Name	Entrez Gene ID	Ensemble Gene ID	Alternative gene name	Full name and/or description		Gene Name	Entrez Gene ID	Bid -/-	Bid+/+
1	Ndufa5	68202	ENSMUSG00000023089	Ndufa5	NADH dehydrogenase (ubiquinone) 1 alpha subcomplex, 5		Abcd2	26874	18	5
2	Prosc	114863	ENSMUSG00000031485	Prosc	proline synthetase co-transcribed		Aco2	11429	9	27
3	Mcu	215999	ENSMUSG00000009647	Mcu	Mitochondrial calcium uniporter		Acsl4	50790	22	15
4	Mrps22	64655	ENSMUSG00000032459	Mrps22	mitochondrial ribosomal protein S22		Agk	69923	17	9
5	Sptlc2	20773	ENSMUSG00000021036	Sptlc2	serine palmitoyltransferase, long chain base subunit 2		Ak4	11639	10	3
6	Cyb5r3	109754	ENSMUSG00000018042	Cyb5r3	cytochrome b5 reductase 3		Aldh18a1	56454	24	14
7	Mthfs	107885	ENSMUSG00000066442	Mthfs	5, 10-methenyltetrahydrofolate synthetase		Aldh2	11669	38	71
8	Ak2	11637	ENSMUSG00000028792	Ak2	adenylate kinase 2		As3mt	57344	0	6
9	Hsd17b4	15488	ENSMUSG00000024507	Hsd17b4	hydroxysteroid (17-beta) dehydrogenase 4		Atp5a1	11946	201	296
10	Dhrs7b	216820	ENSMUSG00000042569	Dhrs7b	dehydrogenase/reductase (SDR family) member 7B		Atp5b	11947	273	532
11	Acsl4	50790	ENSMUSG00000031278	Acsl4	acyl-CoA synthetase long-chain family member 4		Atp5g1	11951	10	4
12	Etfa	110842	ENSMUSG00000032314	Etfa	electron transferring flavoprotein, alpha polypeptide		Atp5l	27425	17	39
13	Immt	76614	ENSMUSG00000052337	Immt	inner membrane protein, mitochondrial		Bdh1	71911	29	0
14	Mrps30	59054	ENSMUSG00000021731	Mrps30	mitochondrial ribosomal protein S30		Cox5a	12858	10	25
15	Dnajc11	230935	ENSMUSG00000039768	Dnajc11	DnaJ (Hsp40) homolog, subfamily C, member 11		Cox5b	12859	4	14
16	Clpb	20480	ENSMUSG00000001829	Clpb	ClpB caseinolytic peptidase B		Dcakd	68087	8	1
17	Rpia	19895	ENSMUSG00000053604	Rpia	ribose 5-phosphate isomerase A		Ephx2	13850	0	11
18	Lypla1	18777	ENSMUSG00000025903	Lypla1	lysophospholipase 1		Fasn	14104	51	117
19	Pnpt1	71701	ENSMUSG00000020464	Pnpt1	polyribonucleotide nucleotidyltransferase 1		Gars	353172	4	0
20	Letmd1	68614	ENSMUSG00000037353	Letmd1	LETM1 domain containing 1		Gfm2	320806	3	13
21	Sod2	20656	ENSMUSG00000006818	Sod2	superoxide dismutase 2, mitochondrial		Hadh	15107	5	16
22	Idh3g	15929	ENSMUSG00000002010	Idh3g	isocitrate dehydrogenase 3 (NAD+), gamma		Hadha	97212	57	103
23	Akap1	11640	ENSMUSG00000018428	Akap1	A kinase (PRKA) anchor protein 1		Hk2	15277	33	61
24	Cox4i1	12857	ENSMUSG00000031818	Cox4i1	cytochrome c oxidase subunit IV isoform 1		Hsd17b10	15108	24	13
25	Chchd6	66098	ENSMUSG00000030086	Chchd6	coiled-coil-helix-coiled-coil-helix domain containing 6		Hsd3b1	15492	10	1
26	Nudt8	66387	ENSMUSG00000024869	Nudt8	nudix (nucleoside diphosphate linked moiety X)-type motif 8		Hspa9	15526	12	28
27	Ndufs4	17993	ENSMUSG00000021764	Ndufs4	NADH dehydrogenase (ubiquinone) Fe-S protein 4		Hspd1	15510	76	137
28	Mrpl38	60441	ENSMUSG00000020775	Mrpl38	mitochondrial ribosomal protein L38		Lonp1	74142	18	41
29	Pdha2	18598	ENSMUSG00000047674	Pdha2	pyruvate dehydrogenase E1 alpha 2		Lrpprc	72416	28	71
30	Tysnd1	71767	ENSMUSG00000020087	Tysnd1	trypsin domain containing 1		Macrod1	107227	0	6
31	C1qbp	12261	ENSMUSG00000018446	C1qbp	complement component 1, q subcomponent binding protein		Mtco2	17709	21	47
32	Mrrf	67871	ENSMUSG00000026887	Mrrf	mitochondrial ribosome recycling factor		Mthfd1l	270685	37	74
33	Slc25a33	70556	ENSMUSG00000028982	Slc25a33	solute carrier family 25, member 33		Ndufa12	66414	6	18
34	Ndufaf2	75597	ENSMUSG00000068184	Ndufaf2	NADH dehydrogenase (ubiquinone) 1 alpha subcomplex, assembly factor 2		Ndufa13	67184	5	26
35	Prdx4	53381	ENSMUSG00000025289	Prdx4	peroxiredoxin 4		Ndufa8	68375	13	33
36	Gpam	14732	ENSMUSG00000024978	Gpam	glycerol-3-phosphate acyltransferase, mitochondrial		Ndufa9	66108	29	68
37	Fech	14151	ENSMUSG00000024588	Fech	ferrochelatase		Ndufs1	227197	46	88
38	Lipt1	623661	ENSMUSG00000037216	Lipt1	lipoyltransferase 1		Ndufs4	17993	4	14
39	Tomm40	53333	ENSMUSG00000002984	Tomm40	translocase of outer mitochondrial membrane 40 homolog (yeast)		Ndufv1	17995	14	42
40	Apool	68117	ENSMUSG00000025525	Apool	apolipoprotein O-like		Paics	67054	10	28
41	Mrpl1	94061	ENSMUSG00000029486	Mrpl1	mitochondrial ribosomal protein L1		Phb	18673	51	97
42	Pisd	320951	ENSMUSG00000023452	Pisd	phosphatidylserine decarboxylase		Prdx6	11758	4	0
43	Hsd3b1	15492	ENSMUSG00000027871	Hsd3b1	hydroxy-delta-5-steroid dehydrogenase, 3 beta- and steroid delta-isomerase 1		Rpia	19895	6	0
44	Ehhadh	74147	ENSMUSG00000022853	Ehhadh	enoyl-Coenzyme A, hydratase/3-hydroxyacyl Coenzyme A dehydrogenase		Sdha	66945	36	88
45	Mrpl4	66163	ENSMUSG00000003299	Mrpl4	mitochondrial ribosomal protein L4		Sfxn1	14057	17	36
46	Trnt1	70047	ENSMUSG00000013736	Trnt1	tRNA nucleotidyl transferase, CCA-adding, 1		Slc25a13	50799	18	6
47	Tars2	71807	ENSMUSG00000028107	Tars2	threonyl-tRNA synthetase 2, mitochondrial (putative)		Sqrdl	59010	29	20
48	Ttc7b	104718	ENSMUSG00000033530	Ttc7b	tetratricopeptide repeat domain 7B		Stom	13830	81	29
49	Aldh18a1	56454	ENSMUSG00000025007	Aldh18a1	aldehyde dehydrogenase 18 family, member A1		Tmem14c	66154	34	26
50	Mcat	223722	ENSMUSG00000048755	Mcat	malonyl CoA:ACP acyltransferase (mitochondrial)		Tomm20	67952	2	15
51	Uqcrb	67530	ENSMUSG00000021520	Uqcrb	ubiquinol-cytochrome c reductase binding protein		Tpi1	21991	7	0
52	Gcdh	270076	ENSMUSG00000003809	Gcdh	glutaryl-Coenzyme A dehydrogenase		Trap1	68015	29	63
53	Cisd2	67006	ENSMUSG00000028165	Cisd2	CDGSH iron sulfur domain 2		Tubb3	22152	55	103
54	Lars2	102436	ENSMUSG00000035202	Lars2	leucyl-tRNA synthetase, mitochondrial		Vwa8	219189	0	10
55	Mlycd	56690	ENSMUSG00000074064	Mlycd	malonyl-CoA decarboxylase		Highlighted genes are decreased in Bid-/- (35 total genes)
56	Atic	108147	ENSMUSG00000026192	Atic	5-aminoimidazole-4-carboxamide ribonucleotide formyltransferase/IMP cyclohydrolase
57	Gbas	14467	ENSMUSG00000029432	Gbas	glioblastoma amplified sequence
58	Suclg1	56451	ENSMUSG00000052738	Suclg1	succinate-CoA ligase, GDP-forming, alpha subunit
59	Sfxn2	94279	ENSMUSG00000025036	Sfxn2	sideroflexin 2
60	Mrpl37	56280	ENSMUSG00000028622	Mrpl37	mitochondrial ribosomal protein L37
61	Mthfd1l	270685	ENSMUSG00000040675	Mthfd1l	methylenetetrahydrofolate dehydrogenase (NADP+ dependent) 1-like
62	Idh2	269951	ENSMUSG00000030541	Idh2	isocitrate dehydrogenase 2 (NADP+), mitochondrial
63	Gars	353172	ENSMUSG00000029777	Gars	glycyl-tRNA synthetase
64	Fasn	14104	ENSMUSG00000025153	Fasn	fatty acid synthase
65	As3mt	57344	ENSMUSG00000003559	As3mt	arsenic (+3 oxidation state) methyltransferase
66	Abhd11	68758	ENSMUSG00000040532	Abhd11	abhydrolase domain containing 11
67	Dhodh	56749	ENSMUSG00000031730	Dhodh	dihydroorotate dehydrogenase
68	Ndufs7	75406	ENSMUSG00000020153	Ndufs7	NADH dehydrogenase (ubiquinone) Fe-S protein 7
69	Mpv17l2	234384	ENSMUSG00000035559	Mpv17l2	MPV17 mitochondrial membrane protein-like 2
70	Coq6	217707	ENSMUSG00000021235	Coq6	coenzyme Q6 homolog (yeast)
71	Mrps6	121022	ENSMUSG00000039680	Mrps6	mitochondrial ribosomal protein S6
72	Mfn1	67414	ENSMUSG00000027668	Mfn1	mitofusin 1
73	Atp5h	71679	ENSMUSG00000034566	Atp5h	ATP synthase, H+ transporting, mitochondrial F0 complex, subunit d
74	Mgst3	66447	ENSMUSG00000026688	Mgst3	microsomal glutathione S-transferase 3
75	Acadsb	66885	ENSMUSG00000030861	Acadsb	acyl-Coenzyme A dehydrogenase, short/branched chain
76	Ndufa9	66108	ENSMUSG00000000399	Ndufa9	NADH dehydrogenase (ubiquinone) 1 alpha subcomplex, 9
77	Pgs1	74451	ENSMUSG00000017715	Pgs1	phosphatidylglycerophosphate synthase 1
78	Mrpl44	69163	ENSMUSG00000026248	Mrpl44	mitochondrial ribosomal protein L44
79	Osbpl1a	64291	ENSMUSG00000044252	Osbpl1a	oxysterol binding protein-like 1A
80	Mrps27	218506	ENSMUSG00000041632	Mrps27	mitochondrial ribosomal protein S27
81	Alas1	11655	ENSMUSG00000032786	Alas1	aminolevulinic acid synthase 1
82	Cyc1	66445	ENSMUSG00000022551	Cyc1	cytochrome c-1
83	Shmt2	108037	ENSMUSG00000025403	Shmt2	serine hydroxymethyltransferase 2 (mitochondrial)
84	Cpt1a	12894	ENSMUSG00000024900	Cpt1a	carnitine palmitoyltransferase 1a, liver
85	Lrpprc	72416	ENSMUSG00000024120	Lrpprc	leucine-rich PPR-motif containing
86	Nudt5	53893	ENSMUSG00000025817	Nudt5	nudix (nucleoside diphosphate linked moiety X)-type motif 5
87	Mrps26	99045	ENSMUSG00000037740	Mrps26	mitochondrial ribosomal protein S26
88	Fastkd2	75619	ENSMUSG00000025962	Fastkd2	FAST kinase domains 2
89	Acad9	229211	ENSMUSG00000027710	Acad9	acyl-Coenzyme A dehydrogenase family, member 9
90	Ndufs2	226646	ENSMUSG00000013593	Ndufs2	NADH dehydrogenase (ubiquinone) Fe-S protein 2
91	Ghitm	66092	ENSMUSG00000041028	Ghitm	growth hormone inducible transmembrane protein
92	Rps14	20044	ENSMUSG00000024608	Rps14	ribosomal protein S14
93	Tomm22	223696	ENSMUSG00000022427	Tomm22	translocase of outer mitochondrial membrane 22 homolog (yeast)
94	Ndufb11	104130	ENSMUSG00000031059	Ndufb11	NADH dehydrogenase (ubiquinone) 1 beta subcomplex, 11
95	Gpx4	625249	ENSMUSG00000075706	Gpx4	glutathione peroxidase 4
96	Timm9	30056	ENSMUSG00000021079	Timm9	translocase of inner mitochondrial membrane 9 homolog (yeast)
97	Cox15	226139	ENSMUSG00000040018	Cox15	COX15 homolog, cytochrome c oxidase assembly protein (yeast)
98	Vdac2	22334	ENSMUSG00000021771	Vdac2	voltage-dependent anion channel 2
99	Slc25a25	227731	ENSMUSG00000026819	Slc25a25	solute carrier family 25 (mitochondrial carrier, phosphate carrier), member 25
100	Rars2	109093	ENSMUSG00000028292	Rars2	arginyl-tRNA synthetase 2, mitochondrial
101	Apoa1bp	246703	ENSMUSG00000028070	Apoa1bp	apolipoprotein A-I binding protein
102	Bax	12028	ENSMUSG00000003873	Bax	BCL2-associated X protein
103	Mthfd1	108156	ENSMUSG00000021048	Mthfd1	methylenetetrahydrofolate dehydrogenase (NADP+ dependent), methenyltetrahydrofolate cyclohydrolase, formyltetrahydrofolate synthase
104	Eral1	57837	ENSMUSG00000020832	Eral1	Era (G-protein)-like 1 (E. coli)
105	Dcakd	68087	ENSMUSG00000020935	Dcakd	dephospho-CoA kinase domain containing
106	Bphl	68021	ENSMUSG00000038286	Bphl	biphenyl hydrolase-like (serine hydrolase, breast epithelial mucin-associated antigen)
107	Pgam5	72542	ENSMUSG00000029500	Pgam5	phosphoglycerate mutase family member 5
108	Nfs1	18041	ENSMUSG00000027618	Nfs1	nitrogen fixation gene 1 (S. cerevisiae)
109	Dnaja3	83945	ENSMUSG00000004069	Dnaja3	DnaJ (Hsp40) homolog, subfamily A, member 3
110	Htatip2	53415	ENSMUSG00000039745	Htatip2	HIV-1 tat interactive protein 2, homolog (human)
111	Acsf3	257633	ENSMUSG00000015016	Acsf3	acyl-CoA synthetase family member 3
112	Acad8	66948	ENSMUSG00000031969	Acad8	acyl-Coenzyme A dehydrogenase family, member 8
113	Poldip2	67811	ENSMUSG00000001100	Poldip2	polymerase (DNA-directed), delta interacting protein 2
114	Mpc1	55951	ENSMUSG00000023861	Mpc1	mitochondrial pyruvate carrier 1
115	Cct7	12468	ENSMUSG00000030007	Cct7	chaperonin containing Tcp1, subunit 7 (eta)
116	Rpl34	68436	ENSMUSG00000062006	Rpl34	ribosomal protein L34
117	Aifm1	26926	ENSMUSG00000036932	Aifm1	apoptosis-inducing factor, mitochondrion-associated 1
118	Efha1	68514	ENSMUSG00000021973	Efha1	EF hand domain family A1
119	Gfer	11692	ENSMUSG00000040888	Gfer	growth factor, erv1 (S. cerevisiae)-like (augmenter of liver regeneration)
120	Ecsit	26940	ENSMUSG00000066839	Ecsit	ECSIT homolog (Drosophila)
121	Mrpl13	68537	ENSMUSG00000022370	Mrpl13	mitochondrial ribosomal protein L13
122	Pccb	66904	ENSMUSG00000032527	Pccb	propionyl Coenzyme A carboxylase, beta polypeptide
123	Tubb3	22152	ENSMUSG00000062380	Tubb3	tubulin, beta 3 class III
124	Adck5	268822	ENSMUSG00000022550	Adck5	aarF domain containing kinase 5
125	Pmpca	66865	ENSMUSG00000026926	Pmpca	peptidase (mitochondrial processing) alpha
126	Eci1	13177	ENSMUSG00000024132	Eci1	enoyl-Coenzyme A delta isomerase 1
127	Ctu1	233189	ENSMUSG00000038888	Ctu1	cytosolic thiouridylase subunit 1 homolog (S. pombe)
128	Mrpl33	66845	ENSMUSG00000029142	Mrpl33	mitochondrial ribosomal protein L33
129	Surf1	20930	ENSMUSG00000015790	Surf1	surfeit gene 1
130	Clpx	270166	ENSMUSG00000015357	Clpx	caseinolytic peptidase X (E.coli)
131	Slc25a5	11740	ENSMUSG00000016319	Slc25a5	solute carrier family 25 (mitochondrial carrier, adenine nucleotide translocator), member 5
132	Slc25a16	73132	ENSMUSG00000071253	Slc25a16	solute carrier family 25 (mitochondrial carrier, Graves disease autoantigen), member 16
133	Dna2	327762	ENSMUSG00000036875	Dna2	DNA replication helicase 2 homolog (yeast)
134	Fastkd5	380601	ENSMUSG00000079043	Fastkd5	FAST kinase domains 5
135	Snd1	56463	ENSMUSG00000001424	Snd1	staphylococcal nuclease and tudor domain containing 1
136	Ccdc90b	66365	ENSMUSG00000030613	Ccdc90b	coiled-coil domain containing 90B
137	Slc25a10	27376	ENSMUSG00000025792	Slc25a10	solute carrier family 25 (mitochondrial carrier, dicarboxylate transporter), member 10
138	Pdk3	236900	ENSMUSG00000035232	Pdk3	pyruvate dehydrogenase kinase, isoenzyme 3
139	Ppa2	74776	ENSMUSG00000028013	Ppa2	pyrophosphatase (inorganic) 2
140	Mff	75734	ENSMUSG00000026150	Mff	mitochondrial fission factor
141	Tomm20	67952	ENSMUSG00000093904	Tomm20	translocase of outer mitochondrial membrane 20 homolog (yeast)
142	Pdha1	18597	ENSMUSG00000031299	Pdha1	pyruvate dehydrogenase E1 alpha 1
143	Cox7a2	12866	ENSMUSG00000032330	Cox7a2	cytochrome c oxidase, subunit VIIa 2
144	Slc25a32	69906	ENSMUSG00000022299	Slc25a32	solute carrier family 25, member 32
145	Rars	104458	ENSMUSG00000018848	Rars	arginyl-tRNA synthetase
146	mt-Co1	17708		Cox1	Cytochrome c oxidase I, mitochondrial
147	Golph3	66629	ENSMUSG00000022200	Golph3	golgi phosphoprotein 3
148	Mrps23	64656	ENSMUSG00000023723	Mrps23	mitochondrial ribosomal protein S23
149	Mrpl19	56284	ENSMUSG00000030045	Mrpl19	mitochondrial ribosomal protein L19
150	Ndufa6	67130	ENSMUSG00000022450	Ndufa6	NADH dehydrogenase (ubiquinone) 1 alpha subcomplex, 6 (B14)
151	Acads	11409	ENSMUSG00000029545	Acads	acyl-Coenzyme A dehydrogenase, short chain
152	Acot9	56360	ENSMUSG00000025287	Acot9	acyl-CoA thioesterase 9
153	Bcl2l13	94044	ENSMUSG00000009112	Bcl2l13	BCL2-like 13 (apoptosis facilitator)
154	Gsr	14782	ENSMUSG00000031584	Gsr	glutathione reductase
155	Hsd17b10	15108	ENSMUSG00000025260	Hsd17b10	hydroxysteroid (17-beta) dehydrogenase 10
156	Fkbp8	14232	ENSMUSG00000019428	Fkbp8	FK506 binding protein 8
157	Yars2	70120	ENSMUSG00000022792	Yars2	tyrosyl-tRNA synthetase 2 (mitochondrial)
158	Ndufc2	68197	ENSMUSG00000030647	Ndufc2	NADH dehydrogenase (ubiquinone) 1, subcomplex unknown, 2
159	Carkd	69225	ENSMUSG00000031505	Carkd	carbohydrate kinase domain containing
160	Nt5dc2	70021	ENSMUSG00000071547	Nt5dc2	5'-nucleotidase domain containing 2
161	Ndufb10	68342	ENSMUSG00000040048	Ndufb10	NADH dehydrogenase (ubiquinone) 1 beta subcomplex, 10
162	Idh3b	170718	ENSMUSG00000027406	Idh3b	isocitrate dehydrogenase 3 (NAD+) beta
163	Dhx30	72831	ENSMUSG00000032480	Dhx30	DEAH (Asp-Glu-Ala-His) box polypeptide 30
164	Mrs2	380836	ENSMUSG00000021339	Mrs2	MRS2 magnesium homeostasis factor homolog (S. cerevisiae)
165	Ndufb4	68194	ENSMUSG00000022820	Ndufb4	NADH dehydrogenase (ubiquinone) 1 beta subcomplex 4
166	Pdhx	27402	ENSMUSG00000010914	Pdhx	pyruvate dehydrogenase complex, component X
167	Gapdh	14433	ENSMUSG00000057666	Gapdh	glyceraldehyde-3-phosphate dehydrogenase
168	Ech1	51798	ENSMUSG00000053898	Ech1	enoyl coenzyme A hydratase 1, peroxisomal
169	Abcb8	74610	ENSMUSG00000028973	Abcb8	ATP-binding cassette, sub-family B (MDR/TAP), member 8
170	Cox5a	12858	ENSMUSG00000000088	Cox5a	cytochrome c oxidase, subunit Va
171	2016-03-05	69104	ENSMUSG00000023307	MITOL	membrane-associated ring finger (C3HC4) 5
172	Tmem143	70209	ENSMUSG00000002781	Tmem143	transmembrane protein 143
173	Gfm2	320806	ENSMUSG00000021666	Gfm2	G elongation factor, mitochondrial 2
174	Sucla2	20916	ENSMUSG00000022110	Sucla2	succinate-Coenzyme A ligase, ADP-forming, beta subunit
175	Atpif1	11983	ENSMUSG00000054428	Atpif1	ATPase inhibitory factor 1
176	Cpt2	12896	ENSMUSG00000028607	Cpt2	carnitine palmitoyltransferase 2
177	Mto1	68291	ENSMUSG00000032342	Mto1	mitochondrial translation optimization 1 homolog (S. cerevisiae)
178	Sfxn1	14057	ENSMUSG00000021474	Sfxn1	sideroflexin 1
179	Cox6c	12864	ENSMUSG00000014313	Cox6c	cytochrome c oxidase, subunit VIc
180	Suclg2	20917	ENSMUSG00000061838	Suclg2	succinate-Coenzyme A ligase, GDP-forming, beta subunit
181	Ociad1	68095	ENSMUSG00000029152	Ociad1	OCIA domain containing 1
182	Acox3	80911	ENSMUSG00000029098	Acox3	acyl-Coenzyme A oxidase 3, pristanoyl
183	Timm23	53600	ENSMUSG00000013701	Timm23	translocase of inner mitochondrial membrane 23 homolog (yeast)
184	Mrps34	79044	ENSMUSG00000038880	Mrps34	mitochondrial ribosomal protein S34
185	Afg3l2	69597	ENSMUSG00000024527	Afg3l2	AFG3(ATPase family gene 3)-like 2 (yeast)
186	Ppox	19044	ENSMUSG00000062729	Ppox	protoporphyrinogen oxidase
187	Paics	67054	ENSMUSG00000029247	Paics	phosphoribosylaminoimidazole carboxylase, phosphoribosylaminoribosylaminoimidazole, succinocarboxamide synthetase
188	Dap3	65111	ENSMUSG00000068921	Dap3	death associated protein 3
189	Prdx3	11757	ENSMUSG00000024997	Prdx3	peroxiredoxin 3
190	Rpl10a	19896	ENSMUSG00000037805	Rpl10a	ribosomal protein L10A
191	Slc30a9	109108	ENSMUSG00000029221	Slc30a9	solute carrier family 30 (zinc transporter), member 9
192	Mrpl16	94063	ENSMUSG00000024683	Mrpl16	mitochondrial ribosomal protein L16
193	Ndufaf3	66706	ENSMUSG00000070283	Ndufaf3	NADH dehydrogenase (ubiquinone) 1 alpha subcomplex, assembly factor 3
194	Ccdc51	66658	ENSMUSG00000025645	Ccdc51	coiled-coil domain containing 51
195	Acp6	66659	ENSMUSG00000028093	Acp6	acid phosphatase 6, lysophosphatidic
196	Lap3	66988	ENSMUSG00000039682	Lap3	leucine aminopeptidase 3
197	Abcd1	11666	ENSMUSG00000031378	Abcd1	ATP-binding cassette, sub-family D (ALD), member 1
198	Ndufaf6	76947	ENSMUSG00000050323	Ndufaf6	NADH dehydrogenase (ubiquinone) complex I, assembly factor 6
199	Stoml2	66592	ENSMUSG00000028455	Stoml2	stomatin (Epb7.2)-like 2
200	Arf5	11844	ENSMUSG00000020440	Arf5	ADP-ribosylation factor 5
201	Ndufb7	66916	ENSMUSG00000033938	Ndufb7	NADH dehydrogenase (ubiquinone) 1 beta subcomplex, 7
202	Acat1	110446	ENSMUSG00000032047	Acat1	acetyl-Coenzyme A acetyltransferase 1
203	Tpi1	21991	ENSMUSG00000023456	Tpi1	triosephosphate isomerase 1
204	Mpc2	70456	ENSMUSG00000026568	Mpc2	mitochondrial pyruvate carrier 2
205	Cyp11a1	13070	ENSMUSG00000032323	Cyp11a1	cytochrome P450, family 11, subfamily a, polypeptide 1
206	Rhot2	214952	ENSMUSG00000025733	Rhot2	ras homolog gene family, member T2
207	Fth1	14319	ENSMUSG00000024661	Fth1	ferritin heavy chain 1
208	Tomm34	67145	ENSMUSG00000018322	Tomm34	translocase of outer mitochondrial membrane 34
209	Aldh3a2	11671	ENSMUSG00000010025	Aldh3a2	aldehyde dehydrogenase family 3, subfamily A2
210	Atxn2	20239	ENSMUSG00000042605	Atxn2	ataxin 2
211	Mocs1	56738	ENSMUSG00000064120	Mocs1	molybdenum cofactor synthesis 1
212	Parl	381038	ENSMUSG00000033918	Parl	presenilin associated, rhomboid-like
213	Hspa9	15526	ENSMUSG00000024359	Hspa9	heat shock protein 9
214	Slc25a35	71998	ENSMUSG00000018740	Slc25a35	solute carrier family 25, member 35
215	Slc25a20	57279	ENSMUSG00000032602	Slc25a20	solute carrier family 25 (mitochondrial carnitine/acylcarnitine translocase), member 20
216	Atp5g1	11951	ENSMUSG00000006057	Atp5g1	ATP synthase, H+ transporting, mitochondrial F0 complex, subunit c1 (subunit 9)
217	Bid	12122	ENSMUSG00000004446	Bid	BH3 interacting domain death agonist
218	Sod1	20655	ENSMUSG00000022982	Sod1	superoxide dismutase 1, soluble
219	Pitrm1	69617	ENSMUSG00000021193	Pitrm1	pitrilysin metallepetidase 1
220	Mipep	70478	ENSMUSG00000021993	Mipep	mitochondrial intermediate peptidase
221	Vdac1	22333	ENSMUSG00000020402	Vdac1	voltage-dependent anion channel 1
222	Gpd2	14571	ENSMUSG00000026827	Gpd2	glycerol phosphate dehydrogenase 2, mitochondrial
223	Tmem14c	66154	ENSMUSG00000021361	Tmem14c	transmembrane protein 14C
224	Eefsec	65967	ENSMUSG00000033216	Eefsec	eukaryotic elongation factor, selenocysteine-tRNA-specific
225	Ccdc109b	66815	ENSMUSG00000027994	Ccdc109b	coiled-coil domain containing 109B
226	Mfn2	170731	ENSMUSG00000029020	Mfn2	mitofusin 2
227	Mccc2	78038	ENSMUSG00000021646	Mccc2	methylcrotonoyl-Coenzyme A carboxylase 2 (beta)
228	Hspd1	15510	ENSMUSG00000025980	Hspd1	heat shock protein 1 (chaperonin)
229	Ppif	105675	ENSMUSG00000021868	Ppif	peptidylprolyl isomerase F (cyclophilin F)
230	Oxa1l	69089	ENSMUSG00000000959	Oxa1l	oxidase assembly 1-like
231	Kars	85305	ENSMUSG00000031948	Kars	lysyl-tRNA synthetase
232	Mrpl53	68499	ENSMUSG00000030037	Mrpl53	mitochondrial ribosomal protein L53
233	Echdc1	52665	ENSMUSG00000019883	Echdc1	enoyl Coenzyme A hydratase domain containing 1
234	Glod4	67201	ENSMUSG00000017286	Glod4	glyoxalase domain containing 4
235	Atp5c1	11949	ENSMUSG00000025781	Atp5c1	ATP synthase, H+ transporting, mitochondrial F1 complex, gamma polypeptide 1
236	Timm13	30055	ENSMUSG00000020219	Timm13	translocase of inner mitochondrial membrane 13 homolog (yeast)
237	Uqcrq	22272	ENSMUSG00000044894	Uqcrq	ubiquinol-cytochrome c reductase, complex III subunit VII
238	Mrps35	232536	ENSMUSG00000040112	Mrps35	mitochondrial ribosomal protein S35
239	Grpel1	17713	ENSMUSG00000029198	Grpel1	GrpE-like 1, mitochondrial
240	Cox6b1	110323	ENSMUSG00000036751	Cox6b1	cytochrome c oxidase, subunit VIb polypeptide 1
241	Acad10	71985	ENSMUSG00000029456	Acad10	acyl-Coenzyme A dehydrogenase family, member 10
242	Bcat2	12036	ENSMUSG00000030826	Bcat2	branched chain aminotransferase 2, mitochondrial
243	Tkt	21881	ENSMUSG00000021957	Tkt	transketolase
244	Mrpl12	56282	ENSMUSG00000039640	Mrpl12	mitochondrial ribosomal protein L12
245	Adck2	57869	ENSMUSG00000046947	Adck2	aarF domain containing kinase 2
246	Ndufs1	227197	ENSMUSG00000025968	Ndufs1	NADH dehydrogenase (ubiquinone) Fe-S protein 1
247	Crat	12908	ENSMUSG00000026853	Crat	carnitine acetyltransferase
248	Fundc1	72018	ENSMUSG00000025040	Fundc1	FUN14 domain containing 1
249	Akr7a2	110198	ENSMUSG00000028743		aflatoxin aldehyde reductase
250	Fpgs	14287	ENSMUSG00000009566	Fpgs	folylpolyglutamyl synthetase
251	Macrod1	107227	ENSMUSG00000036278	Macrod1	MACRO domain containing 1
252	Acaca	107476	ENSMUSG00000020532	Acaca	acetyl-Coenzyme A carboxylase alpha
253	Nme4	56520	ENSMUSG00000024177	Nme4	NME/NM23 nucleoside diphosphate kinase 4
254	Cisd1	52637	ENSMUSG00000037710	Cisd1	CDGSH iron sulfur domain 1
255	Agk	69923	ENSMUSG00000029916	Agk	acylglycerol kinase
256	Gsto1	14873	ENSMUSG00000025068	Gsto1	glutathione S-transferase omega 1
257	Opa1	74143	ENSMUSG00000038084	Opa1	optic atrophy 1
258	Slc25a3	18674	ENSMUSG00000061904	Slc25a3	solute carrier family 25 (mitochondrial carrier, phosphate carrier), member 3
259	Cat	12359	ENSMUSG00000027187	Cat	catalase
260	Slc25a4	11739	ENSMUSG00000031633	Slc25a4	solute carrier family 25 (mitochondrial carrier, adenine nucleotide translocator), member 4
261	Mrps11	67994	ENSMUSG00000030611	Mrps11	mitochondrial ribosomal protein S11
262	Atp5b	11947	ENSMUSG00000025393	Atp5b	ATP synthase, H+ transporting mitochondrial F1 complex, beta subunit
263	Ccdc56	52469	ENSMUSG00000017188	Coa3	cytochrome c oxidase assembly factor 3
264	Tcirg1	27060	ENSMUSG00000001750	Tcirg1	T cell, immune regulator 1, ATPase, H+ transporting, lysosomal V0 protein A3
265	Ndufs6	407785	ENSMUSG00000021606	Ndufs6	NADH dehydrogenase (ubiquinone) Fe-S protein 6
266	Ptges2	96979	ENSMUSG00000026820	Ptges2	prostaglandin E synthase 2
267	Ptrh2	217057	ENSMUSG00000072582	Ptrh2	peptidyl-tRNA hydrolase 2
268	Ide	15925	ENSMUSG00000056999	Ide	insulin degrading enzyme
269	Timm50	66525	ENSMUSG00000003438	Timm50	translocase of inner mitochondrial membrane 50 homolog (yeast)
270	Mtif2	76784	ENSMUSG00000020459	Mtif2	mitochondrial translational initiation factor 2
271	Ethe1	66071	ENSMUSG00000064254	Ethe1	ethylmalonic encephalopathy 1
272	Dars2	226539	ENSMUSG00000026709	Dars2	aspartyl-tRNA synthetase 2 (mitochondrial)
273	2016-03-02	67247	ENSMUSG00000073481	Mosc2	mitochondrial amidoxime reducing component 2
274	Trap1	68015	ENSMUSG00000005981	Trap1	TNF receptor-associated protein 1
275	Sdhb	67680	ENSMUSG00000009863	Sdhb	succinate dehydrogenase complex, subunit B, iron sulfur (Ip)
276	Hint2	68917	ENSMUSG00000028470	Hint2	histidine triad nucleotide binding protein 2
277	Dlat	235339	ENSMUSG00000000168	Dlat	dihydrolipoamide S-acetyltransferase (E2 component of pyruvate dehydrogenase complex)
278	Micu1	216001	ENSMUSG00000020111	Micu1	mitochondrial calcium uptake 1
279	Bak1	12018	ENSMUSG00000057789	Bak1	BCL2-antagonist/killer 1
280	Mpv17	17527	ENSMUSG00000090262	Mpv17	MpV17 mitochondrial inner membrane protein
281	Dld	13382	ENSMUSG00000020664	Dld	dihydrolipoamide dehydrogenase
282	Nit1	27045	ENSMUSG00000013997	Nit1	nitrilase 1
283	Mtx1	17827	ENSMUSG00000064068	Mtx1	metaxin 1
284	Casp8	12370	ENSMUSG00000026029	Casp8	caspase 8
285	Cyb5r1	72017	ENSMUSG00000026456	Cyb5r1	cytochrome b5 reductase 1
286	Hadh	15107	ENSMUSG00000027984	Hadh	hydroxyacyl-Coenzyme A dehydrogenase
287	Atad3	108888	ENSMUSG00000029036	Tob3	ATPase family, AAA domain containing 3A
288	Slc25a11	67863	ENSMUSG00000014606	Slc25a11	solute carrier family 25 (mitochondrial carrier oxoglutarate carrier), member 11
289	Pdhb	68263	ENSMUSG00000021748	Pdhb	pyruvate dehydrogenase (lipoamide) beta
290	Acadvl	11370	ENSMUSG00000018574	Acadvl	acyl-Coenzyme A dehydrogenase, very long chain
291	Ndufb8	67264	ENSMUSG00000025204	Ndufb8	NADH dehydrogenase (ubiquinone) 1 beta subcomplex 8
292	Mrps2	118451	ENSMUSG00000035772	Mrps2	mitochondrial ribosomal protein S2
293	Uqcrc2	67003	ENSMUSG00000030884	Uqcrc2	ubiquinol cytochrome c reductase core protein 2
294	Acaa1a	113868	ENSMUSG00000036138	Acaa1a	acetyl-Coenzyme A acyltransferase 1A
295	Uqcrfs1	66694	ENSMUSG00000038462	Uqcrfs1	ubiquinol-cytochrome c reductase, Rieske iron-sulfur polypeptide 1
296	Mdh2	17448	ENSMUSG00000019179	Mdh2	malate dehydrogenase 2, NAD (mitochondrial)
297	Afg3l1	114896	ENSMUSG00000031967	Afg3l1	AFG3(ATPase family gene 3)-like 1 (yeast)
298	Mccc1	72039	ENSMUSG00000027709	Mccc1	methylcrotonoyl-Coenzyme A carboxylase 1 (alpha)
299	Gfm1	28030	ENSMUSG00000027774	Gfm1	G elongation factor, mitochondrial 1
300	Hsdl1	72552	ENSMUSG00000034189	Hsdl1	hydroxysteroid dehydrogenase like 1
301	Pmpcb	73078	ENSMUSG00000029017	Pmpcb	peptidase (mitochondrial processing) beta
302	Sdhd	66925	ENSMUSG00000000171	Sdhd	succinate dehydrogenase complex, subunit D, integral membrane protein
303	Opa3	403187	ENSMUSG00000052214	Opa3	optic atrophy 3
304	Ndufa7	66416	ENSMUSG00000041881	Ndufa7	NADH dehydrogenase (ubiquinone) 1 alpha subcomplex, 7 (B14.5a)
305	Scp2	20280	ENSMUSG00000028603	Scp2	sterol carrier protein 2, liver
306	Nnt	18115	ENSMUSG00000025453	Nnt	nicotinamide nucleotide transhydrogenase
307	Cbr4	234309	ENSMUSG00000031641	Cbr4	carbonyl reductase 4
308	Hk2	15277	ENSMUSG00000000628	Hk2	hexokinase 2
309	Ptcd3	69956	ENSMUSG00000063884	Ptcd3	pentatricopeptide repeat domain 3
310	Hmbs	15288	ENSMUSG00000032126	Hmbs	hydroxymethylbilane synthase
311	Gk	14933	ENSMUSG00000025059	Gyk	Glycerol kinase
312	Bcl2	12043	ENSMUSG00000057329	Bcl2	B cell leukemia/lymphoma 2
313	Abcd2	26874	ENSMUSG00000055782	Abcd2	ATP-binding cassette, sub-family D (ALD), member 2
314	Ogdh	18293	ENSMUSG00000020456	Ogdh	oxoglutarate dehydrogenase (lipoamide)
315	Akap10	56697	ENSMUSG00000047804	Akap10	A kinase (PRKA) anchor protein 10
316	Ivd	56357	ENSMUSG00000027332	Ivd	isovaleryl coenzyme A dehydrogenase
317	Gstk1	76263	ENSMUSG00000029864	Gstk1	glutathione S-transferase kappa 1
318	Cars2	71941	ENSMUSG00000056228	Cars2	cysteinyl-tRNA synthetase 2 (mitochondrial)(putative)
319	Tsfm	66399	ENSMUSG00000040521	Tsfm	Ts translation elongation factor, mitochondrial
320	Dhrs4	28200	ENSMUSG00000022210	Dhrs4	dehydrogenase/reductase (SDR family) member 4
321	Mrps7	50529	ENSMUSG00000046756	Mrps7	mitchondrial ribosomal protein S7
322	Prodh	19125	ENSMUSG00000003526	Prodh	proline dehydrogenase
323	Tmem177	66343	ENSMUSG00000036975	Tmem177	transmembrane protein 177
324	Tamm41	68971	ENSMUSG00000030316	Tamm41	TAM41, mitochondrial translocator assembly and maintenance protein, homolog (S. cerevisiae)
325	Pck2	74551	ENSMUSG00000040618	Pck2	phosphoenolpyruvate carboxykinase 2 (mitochondrial)
326	Emc2	66736	ENSMUSG00000022337	Emc2	ER membrane protein complex subunit 2
327	Ankrd26	232339	ENSMUSG00000007827	Ankrd26	ankyrin repeat domain 26
328	Rhot1	59040	ENSMUSG00000017686	Rhot1	ras homolog gene family, member T1
329	Pam16	66449	ENSMUSG00000014301	Pam16	presequence translocase-asssociated motor 16 homolog (S. cerevisiae)
330	Lonp2	66887	ENSMUSG00000047866	Lonp2	lon peptidase 2, peroxisomal
331	Slc25a13	50799	ENSMUSG00000015112	Slc25a13	solute carrier family 25 (mitochondrial carrier, adenine nucleotide translocator), member 13
332	Idh3a	67834	ENSMUSG00000032279	Idh3a	isocitrate dehydrogenase 3 (NAD+) alpha
333	Vars2	68915	ENSMUSG00000038838	Vars2	valyl-tRNA synthetase 2, mitochondrial (putative)
334	Aco1	11428	ENSMUSG00000028405	Aco1	aconitase 1
335	Aco2	11429	ENSMUSG00000022477	Aco2	aconitase 2, mitochondrial
336	Glrx5	73046	ENSMUSG00000021102	Glrx5	glutaredoxin 5 homolog (S. cerevisiae)
337	Glud1	14661	ENSMUSG00000021794	Glud1	glutamate dehydrogenase 1
338	Ndufv1	17995	ENSMUSG00000037916	Ndufv1	NADH dehydrogenase (ubiquinone) flavoprotein 1
339	Cs	12974	ENSMUSG00000005683	Cs	citrate synthase
340	Ephx2	13850	ENSMUSG00000022040	Ephx2	epoxide hydrolase 2, cytoplasmic
341	Fam210b	67017	ENSMUSG00000027495	2010011I20Rik	family with sequence similiarity 210, member B
342	Mtch1	56462	ENSMUSG00000024012	Mtch1	mitochondrial carrier homolog 1 (C. elegans)
343	Exog	208194	ENSMUSG00000042787	Exog	endo/exonuclease (5'-3'), endonuclease G-like
344	Spg7	234847	ENSMUSG00000000738	Spg7	spastic paraplegia 7 homolog (human)
345	Ndufa13	67184	ENSMUSG00000036199	Ndufa13	NADH dehydrogenase (ubiquinone) 1 alpha subcomplex, 13
346	Ndufaf4	68493	ENSMUSG00000028261	Ndufaf4	NADH dehydrogenase (ubiquinone) 1 alpha subcomplex, assembly factor 4
347	Timm22	56322	ENSMUSG00000020843	Timm22	translocase of inner mitochondrial membrane 22 homolog (yeast)
348	Bdh1	71911	ENSMUSG00000046598	Bdh1	3-hydroxybutyrate dehydrogenase, type 1
349	Arl2	56327	ENSMUSG00000024944	Arl2	ADP-ribosylation factor-like 2
350	Agpat5	52123	ENSMUSG00000031467	Agpat5	1-acylglycerol-3-phosphate O-acyltransferase 5 (lysophosphatidic acid acyltransferase, epsilon)
351	Ndufa4	17992	ENSMUSG00000029632	Ndufa4	NADH dehydrogenase (ubiquinone) 1 alpha subcomplex, 4
352	Hibadh	58875	ENSMUSG00000029776	Hibadh	3-hydroxyisobutyrate dehydrogenase
353	Hccs	15159	ENSMUSG00000031352	Hccs	holocytochrome c synthetase
354	Acad11	102632	ENSMUSG00000090150	Acad11	acyl-Coenzyme A dehydrogenase family, member 11
355	Rps15a	267019	ENSMUSG00000008683	Rps15a	ribosomal protein S15A
356	Suox	211389	ENSMUSG00000049858	Suox	sulfite oxidase
357	Ndufa11	69875	ENSMUSG00000002379	Ndufa11	NADH dehydrogenase (ubiquinone) 1 alpha subcomplex 11
358	Tmem126a	66271	ENSMUSG00000030615	Tmem126a	transmembrane protein 126A
359	Isoc2a	664994	ENSMUSG00000086784	Isoc2a	isochorismatase domain containing 2a
360	Slc25a28	246696	ENSMUSG00000040414	Slc25a28	solute carrier family 25, member 28
361	Rnmtl1	67390	ENSMUSG00000038046	Rnmtl1	RNA methyltransferase like 1
362	Cpox	12892	ENSMUSG00000022742	Cpox	coproporphyrinogen oxidase
363	Ndufb5	66046	ENSMUSG00000027673	Ndufb5	NADH dehydrogenase (ubiquinone) 1 beta subcomplex, 5
364	Mtnd5	17721		mt-Nd5	NADH dehydrogenase 5, mitochondrial
365	Fundc2	67391	ENSMUSG00000031198	Fundc2	FUN14 domain containing 2
366	Slc25a46	67453	ENSMUSG00000024259	Slc25a46	solute carrier family 25, member 46
367	Vwa8	219189	ENSMUSG00000058997	Vwa8	von Willebrand factor A domain containing 8
368	Rdh14	105014	ENSMUSG00000020621	Rdh14	retinol dehydrogenase 14 (all-trans and 9-cis)
369	Prdx6	11758	ENSMUSG00000026701	Prdx6	peroxiredoxin 6
370	Me1	17436	ENSMUSG00000032418	Me1	malic enzyme 1, NADP(+)-dependent, cytosolic
371	Pc	18563	ENSMUSG00000024892	Pcb	pyruvate carboxylase
372	Mt-Cyb	17711		Cytb	cytochrome b, mitochondrial
373	Rpl35a	57808	ENSMUSG00000060636	Rpl35a	ribosomal protein L35A
374	Abcf2	27407	ENSMUSG00000028953	Abcf2	ATP-binding cassette, sub-family F (GCN20), member 2
375	Ndufs5	595136	ENSMUSG00000028648	Ndufs5	NADH dehydrogenase (ubiquinone) Fe-S protein 5
376	Yme1l1	27377	ENSMUSG00000026775	Yme1l1	YME1-like 1 (S. cerevisiae)
377	Glyat	107146	ENSMUSG00000063683	Glyat	glycine-N-acyltransferase
378	Mrpl23	19935	ENSMUSG00000037772	Mrpl23	mitochondrial ribosomal protein L23
379	P4hb	18453	ENSMUSG00000025130	P4hb	prolyl 4-hydroxylase, beta polypeptide
380	Fam162a	70186	ENSMUSG00000003955	Fam162a	family with sequence similarity 162, member A
381	Ak4	11639	ENSMUSG00000028527	Ak4	adenylate kinase 4
382	Sdha	66945	ENSMUSG00000021577	Sdha	succinate dehydrogenase complex, subunit A, flavoprotein (Fp)
383	Slc25a51	230125	ENSMUSG00000045973	Gm138	solute carrier family 25, member 51
384	Cycs	13063	ENSMUSG00000063694	Cycs	cytochrome c, somatic
385	Cyb5b	66427	ENSMUSG00000031924	Cyb5b	cytochrome b5 type B
386	Mtco2	17709		Cox2	cytochrome c oxidase II, mitochondrial
387	Slc25a21	217593	ENSMUSG00000035472	Slc25a21	solute carrier family 25 (mitochondrial oxodicarboxylate carrier), member 21
388	Atp5f1	11950	ENSMUSG00000000563	Atp5f1	ATP synthase, H+ transporting, mitochondrial F0 complex, subunit B1
389	Hspe1	15528	ENSMUSG00000073676	Hspe1	heat shock protein 1 (chaperonin 10)
390	Ptpmt1	66461	ENSMUSG00000063235	Ptpmt1	protein tyrosine phosphatase, mitochondrial 1
391	Htra2	64704	ENSMUSG00000068329	Htra2	HtrA serine peptidase 2
392	Ndufv3	78330	ENSMUSG00000024038	Ndufv3	NADH dehydrogenase (ubiquinone) flavoprotein 3
393	Tfam	21780	ENSMUSG00000003923	Tfam	transcription factor A, mitochondrial
394	Bckdk	12041	ENSMUSG00000030802	Bckdk	branched chain ketoacid dehydrogenase kinase
395	Mtch2	56428	ENSMUSG00000027282	Mtch2	mitochondrial carrier homolog 2 (C. elegans)
396	Mtnd1	17716		mt-Nd1	NADH dehydrogenase 1, mitochondrial
397	Fh	14194	ENSMUSG00000026526	Fh-1	fumarate hydratase 1, mitochondrial
398	Decr1	67460	ENSMUSG00000028223	Decr1	2,4-dienoyl CoA reductase 1, mitochondrial
399	Mavs	228607	ENSMUSG00000037523	Mavs	mitochondrial antiviral signaling protein
400	Atp5l	27425	ENSMUSG00000038717	Atp5l	ATP synthase, H+ transporting, mitochondrial F0 complex, subunit g
401	Nadkd1	68646	ENSMUSG00000022253	Nadkd1	NAD kinase domain containing 1
402	Dnm1l	74006	ENSMUSG00000022789	Dnm1l	dynamin 1-like
403	Slc25a17	20524	ENSMUSG00000022404	Slc25a17	solute carrier family 25 (mitochondrial carrier, peroxisomal membrane protein), member 17
404	Dbt	13171	ENSMUSG00000000340	Dbt	dihydrolipoamide branched chain transacylase E2
405	Armc10	67211	ENSMUSG00000038525	Armc10	armadillo repeat containing 10
406	Acly	104112	ENSMUSG00000020917	Acly	ATP citrate lyase
407	Rab35	77407	ENSMUSG00000029518	Rab35	RAB35, member RAS oncogene family
408	Sfxn3	94280	ENSMUSG00000025212	Sfxn3	sideroflexin 3
409	Samm50	68653	ENSMUSG00000022437	Samm50	sorting and assembly machinery component 50 homolog (S. cerevisiae)
410	Cox7c	12867	ENSMUSG00000017778	Cox7c	cytochrome c oxidase, subunit VIIc
411	Atpaf1	230649	ENSMUSG00000028710	Atpaf1	ATP synthase mitochondrial F1 complex assembly factor 1
412	Ssbp1	381760	ENSMUSG00000029911	Ssbp1	single-stranded DNA binding protein 1
413	Tomm70a	28185	ENSMUSG00000022752	Tomm70a	translocase of outer mitochondrial membrane 70 homolog A (yeast)
414	Hadhb	231086	ENSMUSG00000059447	Hadhb	hydroxyacyl-Coenzyme A dehydrogenase/3-ketoacyl-Coenzyme A thiolase/enoyl-Coenzyme A hydratase (trifunctional protein), beta subunit
415	Tefm	68550	ENSMUSG00000046909	1110002N22Rik	transcription elongation factor, mitochondrial
416	Ndufb9	66218	ENSMUSG00000022354	Ndufb9	NADH dehydrogenase (ubiquinone) 1 beta subcomplex, 9
417	Etfdh	66841	ENSMUSG00000027809	Etfdh	electron transferring flavoprotein, dehydrogenase
418	Stom	13830	ENSMUSG00000026880	Stom	stomatin
419	Acox1	11430	ENSMUSG00000020777	Acox1	acyl-Coenzyme A oxidase 1, palmitoyl
420	Zadh2	225791	ENSMUSG00000049090	Zadh2	zinc binding alcohol dehydrogenase, domain containing 2
421	Atp5e	67126	ENSMUSG00000016252	Atp5e	ATP synthase, H+ transporting, mitochondrial F1 complex, epsilon subunit
422	Mrpl10	107732	ENSMUSG00000001445	Mrpl10	mitochondrial ribosomal protein L10
423	Cisd3	217149	ENSMUSG00000078695	Cisd3	CDGSH iron sulfur domain 3
424	Hmgcl	15356	ENSMUSG00000028672	Hmgcl	3-hydroxy-3-methylglutaryl-Coenzyme A lyase
425	Fam82a2	67809	ENSMUSG00000070730	Fam82a2	family with sequence similarity 82, member A2
426	Endog	13804	ENSMUSG00000015337	Endog	endonuclease G
427	Sdhc	66052	ENSMUSG00000058076	Sdhc	succinate dehydrogenase complex, subunit C, integral membrane protein
428	Dhrs1	52585	ENSMUSG00000002332	Dhrs1	dehydrogenase/reductase (SDR family) member 1
429	Acsf2	264895	ENSMUSG00000076435	Acsf2	acyl-CoA synthetase family member 2
430	Abcd3	19299	ENSMUSG00000028127	Abcd3	ATP-binding cassette, sub-family D (ALD), member 3
431	Acadl	11363	ENSMUSG00000026003	Acadl	acyl-Coenzyme A dehydrogenase, long-chain
432	Mrpl15	27395	ENSMUSG00000033845	Mrpl15	mitochondrial ribosomal protein L15
433	Gls	14660	ENSMUSG00000026103	Gls	glutaminase
434	Pycr2	69051	ENSMUSG00000026520	Pycr2	pyrroline-5-carboxylate reductase family, member 2
435	Atp5sl	66349	ENSMUSG00000057229	Atp5sl	ATP5S-like
436	Rab32	67844	ENSMUSG00000019832	Rab32	RAB32, member RAS oncogene family
437	Ccdc127	67433	ENSMUSG00000021578	Ccdc127	coiled-coil domain containing 127
438	Adck1	72113	ENSMUSG00000021044	Adck1	aarF domain containing kinase 1
439	Timm17a	21854	ENSMUSG00000062580	Timm17a	translocase of inner mitochondrial membrane 17a
440	Pex11b	18632	ENSMUSG00000028102	Pex11b	peroxisomal biogenesis factor 11 beta
441	Sqrdl	59010	ENSMUSG00000005803	Sqrdl	sulfide quinone reductase-like (yeast)
442	Pdk1	228026	ENSMUSG00000006494	Pdk1	pyruvate dehydrogenase kinase, isoenzyme 1
443	Gpi	14751	ENSMUSG00000036427	Gpi1	glucose phosphate isomerase 1
444	Acss1	68738	ENSMUSG00000027452	Acss1	acyl-CoA synthetase short-chain family member 1
445	Pcca	110821	ENSMUSG00000041650	Pcca	propionyl-Coenzyme A carboxylase, alpha polypeptide
446	Lonp1	74142	ENSMUSG00000041168	Lonp1	lon peptidase 1, mitochondrial
447	Vdac3	22335	ENSMUSG00000008892	Vdac3	voltage-dependent anion channel 3
448	Sdr39u1	654795	ENSMUSG00000022223	Sdr39u1	short chain dehydrogenase/reductase family 39U, member 1
449	Ogdhl	239017	ENSMUSG00000021913	Ogdhl	oxoglutarate dehydrogenase-like
450	Atad1	67979	ENSMUSG00000013662	Atad1	ATPase family, AAA domain containing 1
451	Mtx2	53375	ENSMUSG00000027099	Mtx2	metaxin 2
452	Hadha	97212	ENSMUSG00000025745	Hadha	hydroxyacyl-Coenzyme A dehydrogenase/3-ketoacyl-Coenzyme A thiolase/enoyl-Coenzyme A hydratase (trifunctional protein), alpha subunit
453	Grhpr	76238	ENSMUSG00000035637	Grhpr	glyoxylate reductase/hydroxypyruvate reductase
454	Tars	110960	ENSMUSG00000022241	Tars	threonyl-tRNA synthetase
455	Mecr	26922	ENSMUSG00000028910	Mecr	mitochondrial trans-2-enoyl-CoA reductase
456	Slc25a12	78830	ENSMUSG00000027010	Slc25a12	solute carrier family 25 (mitochondrial carrier, Aralar), member 12
457	Rdh11	17252	ENSMUSG00000066441	Rdh11	retinol dehydrogenase 11
458	Hibch	227095	ENSMUSG00000041426	Hibch	3-hydroxyisobutyryl-Coenzyme A hydrolase
459	Ndufs8	225887	ENSMUSG00000059734	Ndufs8	NADH dehydrogenase (ubiquinone) Fe-S protein 8
460	Fam210a	108654	ENSMUSG00000038121	4933403F05Rik	family with sequence similarity 210, member A
461	Prdx5	54683	ENSMUSG00000024953	Prdx5	peroxiredoxin 5
462	Rdh13	108841	ENSMUSG00000008435	Rdh13	retinol dehydrogenase 13 (all-trans and 9-cis)
463	Park7	57320	ENSMUSG00000028964	Park7	Parkinson disease (autosomal recessive, early onset) 7
464	Abcb10	56199	ENSMUSG00000031974	Abcb10	ATP-binding cassette, sub-family B (MDR/TAP), member 10
465	Mrpl30	107734	ENSMUSG00000026087	Mrpl30	mitochondrial ribosomal protein L30
466	Plgrkt	67759	NSMUSG00000016495	Plg-RKT	plasminogen receptor, C-terminal lysine transmembrane protein
467	Mrps25	64658	ENSMUSG00000014551	Mrps25	mitochondrial ribosomal protein S25
468	Ndufa8	68375	ENSMUSG00000026895	Ndufa8	NADH dehydrogenase (ubiquinone) 1 alpha subcomplex, 8
469	Acsl1	14081	ENSMUSG00000018796	Acsl1	acyl-CoA synthetase long-chain family member 1
470	Flad1	319945	ENSMUSG00000042642	Flad1	RFad1, flavin adenine dinucleotide synthetase, homolog (yeast)
471	Ptcd2	68927	ENSMUSG00000021650	Ptcd2	pentatricopeptide repeat domain 2
472	Sars2	71984	ENSMUSG00000070699	Sars2	seryl-aminoacyl-tRNA synthetase 2
473	Atp5j2	57423	ENSMUSG00000038690	Atp5j2	ATP synthase, H+ transporting, mitochondrial F0 complex, subunit F2
474	Acaa2	52538	ENSMUSG00000036880	Acaa2	acetyl-Coenzyme A acyltransferase 2 (mitochondrial 3-oxoacyl-Coenzyme A thiolase)
475	Phb	18673	ENSMUSG00000038845	Phb	prohibitin
476	Tbrg4	21379	ENSMUSG00000000384	Tbrg4	transforming growth factor beta regulated gene 4
477	Coasy	71743	ENSMUSG00000001755	Coasy	Coenzyme A synthase
478	Oat	18242	ENSMUSG00000030934	Oat	ornithine aminotransferase
479	Ndufs3	68349	ENSMUSG00000005510	Ndufs3	NADH dehydrogenase (ubiquinone) Fe-S protein 3
480	Gpx1	14775	ENSMUSG00000063856	Gpx1	glutathione peroxidase 1
481	Etfb	110826	ENSMUSG00000004610	Etfb	electron transferring flavoprotein, beta polypeptide
482	Ndufb6	230075	ENSMUSG00000071014	Ndufb6	NADH dehydrogenase (ubiquinone) 1 beta subcomplex, 6
483	Atp5o	28080	ENSMUSG00000022956	Atp5o	ATP synthase, H+ transporting, mitochondrial F1 complex, O subunit
484	Nars2	244141	ENSMUSG00000018995	Nars2	asparaginyl-tRNA synthetase 2 (mitochondrial)(putative)
485	Ddx28	71986	ENSMUSG00000045538	Ddx28	DEAD (Asp-Glu-Ala-Asp) box polypeptide 28
486	Coq5	52064	ENSMUSG00000041733	Coq5	coenzyme Q5 homolog, methyltransferase (yeast)
487	Dnajc19	67713	ENSMUSG00000027679	Dnajc19	DnaJ (Hsp40) homolog, subfamily C, member 19
488	Ndufa10	67273	ENSMUSG00000026260	Ndufa10	NADH dehydrogenase (ubiquinone) 1 alpha subcomplex 10
489	Timm44	21856	ENSMUSG00000002949	Timm44	translocase of inner mitochondrial membrane 44
490	Got2	14719	ENSMUSG00000031672	Got2	glutamate oxaloacetate transaminase 2, mitochondrial
491	Atp5i	11958	ENSMUSG00000050856	Atp5k	ATP synthase, H+ transporting mitochondrial F1F0 complex, subunit E
492	Ndufab1	70316	ENSMUSG00000030869	Ndufab1	NADH dehydrogenase (ubiquinone) 1, alpha/beta subcomplex, 1
493	Comt	12846	ENSMUSG00000000326	Comt	catechol-O-methyltransferase
494	Bckdha	12039	ENSMUSG00000060376	Bckdha	branched chain ketoacid dehydrogenase E1, alpha polypeptide
495	Dlst	78920	ENSMUSG00000004789	Dlst	dihydrolipoamide S-succinyltransferase (E2 component of 2-oxo-glutarate complex)
496	Uqcrh	66576	ENSMUSG00000063882	Uqcrh	ubiquinol-cytochrome c reductase hinge protein
497	Uqcrc1	22273	ENSMUSG00000025651	Uqcrc1	ubiquinol-cytochrome c reductase core protein 1
498	D10Jhu81e	28295	ENSMUSG00000053329	D10Jhu81e	DNA segment, Chr 10, Johns Hopkins University 81 expressed
499	Me2	107029	ENSMUSG00000024556	Me2	malic enzyme 2, NAD(+)-dependent, mitochondrial
500	Mtatp8	17706		mt-Atp8	atp synthase 8, mitochondrial
501	Cox5b	12859	ENSMUSG00000061518	Cox5b	cytochrome c oxidase, subunit Vb
502	Acot2	171210	ENSMUSG00000021226	Acot2	acyl-CoA thioesterase 2
503	Oxsm	71147	ENSMUSG00000021786	Oxsm	3-oxoacyl-ACP synthase, mitochondrial
504	Fis1	66437	ENSMUSG00000019054	Fis1	fission 1 (mitochondrial outer membrane) homolog (yeast)
505	Xpnpep3	321003	ENSMUSG00000022401	Xpnpep3	X-prolyl aminopeptidase (aminopeptidase P) 3, putative
506	Usmg5	66477	ENSMUSG00000071528	Usmg5	upregulated during skeletal muscle growth 5
507	Timm17b	21855	ENSMUSG00000031158	Timm17b	translocase of inner mitochondrial membrane 17b
508	Slc25a1	13358	ENSMUSG00000003528	Slc25a1	solute carrier family 25 (mitochondrial carrier, citrate transporter), member 1
509	Ndufa3	66091	ENSMUSG00000035674	Ndufa3	NADH dehydrogenase (ubiquinone) 1 alpha subcomplex, 3
510	Bcs1l	66821	ENSMUSG00000026172	Bcs1l	BCS1-like (yeast)
511	Chchd3	66075	ENSMUSG00000053768	Chchd3	coiled-coil-helix-coiled-coil-helix domain containing 3
512	Fdxr	14149	ENSMUSG00000018861	Fdxr	ferredoxin reductase
513	Ndufa12	66414	ENSMUSG00000020022	Ndufa12	NADH dehydrogenase (ubiquinone) 1 alpha subcomplex, 12
514	Eci2	23986	ENSMUSG00000021417	Eci2	enoyl-Coenzyme A delta isomerase 2
515	Oxct1	67041	ENSMUSG00000022186	Oxct1	3-oxoacid CoA transferase 1
516	Mars2	212679	ENSMUSG00000046994	Mars2	methionine-tRNA synthetase 2 (mitochondrial)
517	Phb2	12034	ENSMUSG00000004264	Phb2	prohibitin 2
518	Supv3l1	338359	ENSMUSG00000020079	Supv3l1	suppressor of var1, 3-like 1 (S. cerevisiae)
519	Ndufv2	72900	ENSMUSG00000024099	Ndufv2	NADH dehydrogenase (ubiquinone) flavoprotein 2
520	Iars2	381314	ENSMUSG00000026618	Iars2	isoleucine-tRNA synthetase 2, mitochondrial
521	Letm1	56384	ENSMUSG00000005299	Letm1	leucine zipper-EF-hand containing transmembrane protein 1
522	Echs1	93747	ENSMUSG00000025465	Echs1	enoyl Coenzyme A hydratase, short chain, 1, mitochondrial
523	Uqcc	56046	ENSMUSG00000005882	Uqcc	ubiquinol-cytochrome c reductase complex chaperone, CBP3 homolog (yeast)
524	Cyb5a	109672	ENSMUSG00000024646	Cyb5	cytochrome b5 type A
525	Slc25a22	68267	ENSMUSG00000019082	Slc25a22	solute carrier family 25 (mitochondrial carrier, glutamate), member 22
526	Hk1	15275	ENSMUSG00000037012	Hk1	hexokinase 1
527	Slirp	380773	ENSMUSG00000021040	Slirp	SRA stem-loop interacting RNA binding protein
528	Slc30a6	210148	ENSMUSG00000024069	Slc30a6	solute carrier family 30 (zinc transporter), member 6
529	Slc16a1	20501	ENSMUSG00000032902	Slc16a1	solute carrier family 16 (monocarboxylic acid transporters), member 1
530	Mrpl22	216767	ENSMUSG00000020514	Mrpl22	mitochondrial ribosomal protein L22
531	Lactb	80907	ENSMUSG00000032370	Lactb	lactamase, beta
532	Ucp2	22228	ENSMUSG00000033685	Ucp2	uncoupling protein 2 (mitochondrial, proton carrier)
533	Tufm	233870	ENSMUSG00000073838	Tufm	Tu translation elongation factor, mitochondrial
534	Rps18	20084	ENSMUSG00000008668	Rps18	ribosomal protein S18
535	Mrpl45	67036	ENSMUSG00000018882	Mrpl45	mitochondrial ribosomal protein L45
536	Atp5a1	11946	ENSMUSG00000025428	Atp5a1	ATP synthase, H+ transporting, mitochondrial F1 complex, alpha subunit 1
537	Coq9	67914	ENSMUSG00000031782	Coq9	coenzyme Q9 homolog (yeast)
538	Sco2	100126824	ENSMUSG00000091780	Sco2	SCO cytochrome oxidase deficient homolog 2 (yeast)
539	Aldh2	11669	ENSMUSG00000029455	Aldh2	aldehyde dehydrogenase 2, mitochondrial
540	Pde12	211948	ENSMUSG00000043702	Pde12	phosphodiesterase 12
541	Abcb7	11306	ENSMUSG00000031333	Abcb7	ATP-binding cassette, sub-family B (MDR/TAP), member 7
542	Romo1	67067	ENSMUSG00000067847	Romo1	reactive oxygen species modulator 1
543	Mrps5	77721	ENSMUSG00000027374	Mrps5	mitochondrial ribosomal protein S5
544	Ak3	56248	ENSMUSG00000024782	Ak3	adenylate kinase 3
545	Maip1	68115	ENSMUSG00000025971	9430016H08Rik	matrix AAA peptidase interacting protein 1, mitochondrial
546	Smdt1	69029	ENSMUSG00000022452	1500032L24Rik	UPF0466 protein C22orf32 homolog (Essential MCU regulator, mitochondrial)
547	1110008F13Rik	67388	ENSMUSG00000027637	1110008F13Rik	Uncharacterized protein C20orf24 homolog
548	9030617O03Rik	217830	ENSMUSG00000021185		UPF0317 protein C14orf159 homolog, mitochondria

## Sheet: Figure 6-figure supplement 1e-f
Figure 6 -Figure Supplement 1E
	In-gel activity assay: Super complex (SC I+III2+IV3)					In-gel activity assay: Complex I (CI)
# of mice	Bid+/+	Bid -/-	(Arbritrary units)		# of mice	Bid+/+	Bid -/-	(Arbritrary units)
1	4518.16	3397.8			1	6786.06	7376.06
2	3357.34	3388.8			2	7700.94	7839.06
3	4540.46	2764.39			3	6657.35	6552.06
Figure 6-Figure Supplement 1F			Heart Complex IV Activity
Complexes:	CI + CIII2+ CIV3		CI + CIII2+ CIV2		CI + CIII2+ CIV		CIV
# of mice	Bid+/+	Bid -/-	Bid+/+	Bid -/-	Bid+/+	Bid -/-	Bid+/+	Bid -/-
1	4990.63	3792.63	4105.68	3326.26	9579.28	8789.28	21138.2	17254.1
2	3460.46	3236.39	2553.73	2334.73	7975.28	6070.28	20283.9	19467.8
3	3794.92	4559.26	2996.61	4160.26	8857.28	9157.99	15415.1	15319.1

## Sheet: Figure 6-figure supplement 2
Figure 6-figure supplement 2A						Figure 6-figure supplement 2B						Figure 6-figure supplement 5C
	MitoSOX MPCs (Geometric MFI)						MitoSOX MPCs (Geometric MFI)						DHE MPCs (Geometric MFI)
	No treatment (NT)		Antimycin A (10μM)				(+ FBS)		(-FBS)				(+ FBS)		(-FBS)
Replicates	Bid+/+	Bid -/-	Bid+/+	Bid -/-		Replicates	Bid+/+	Bid -/-	Bid+/+	Bid -/-		Replicates	Bid+/+	Bid -/-	Bid+/+	Bid -/-
1	76.4	37.3	661	397		1	42.5	17.6	400	358		1	388	273	953	695
2	152	31.9	392	385		2	30.2	16.6	206	357		2	243	417	452	637
3	52.3	36.1	327	100		3	31.1	23.2	379	1113		3	547	652	1616	1047
4	33.9	27.8	296	106		4	32.8	19.9	209	918		4	506	591	928	725
5	29.7	17.3	247	128								5	632	690
6	28.6	23	91.2	220								6	556	477
7	34.4											7	578	407
												8	277	365
												9	507	594
												10	756	848
												11	689
Figure 6-figure supplement 2D						Figure 6-figure supplement 2E
	TMRE MPCs (Geometric MFI)						MitoSOX MPCs (Geometric MFI)
	Genotype						Genotype
Replicates	Bid+/+	Bid -/-	Bid -/- + FHA-BidBH3	Bid -/- + FHA-BidBH3AA		Replicates	Bid+/+	Bid -/-	Bid -/- + FHA-BidBH3	Bid -/- + FHA-BidBH3AA
1	1017	1073	1881	1052		1	60.6	73.1	152	864
2	964	1118	1618	906		2	81.9	91.5	195	171
3	982	1052	1744	3078		3	59.5	57.6	108	224
4	1326	1476	2280			4	53.8	45.9	100
Figure 6-figure supplement 2F
	ATP/O Ratio LV Heart Fibers
	CI (GM + ADP)		Rotenone		CII (Rot + Succinate)
# of mice	Bid+/+	Bid-/-	Bid+/+	Bid-/-	Bid+/+	Bid-/-
1	4.61483	3.40461	2.68208	1.62039	1.28331	1.31254
2	1.76556	4.51042	0.137011	0.982219	0.945011	3.0063
3	2.30578	2.18609	0.581725	-1.39952	1.32757	1.36029
4	2.25776	2.5878	1.04338	0.685463	0.797544	1.49932
5	2.37351	3.02847	2.69785	0.0266309	0.845088	1.86403
6	3.2469	0.863227	2.42411	-0.0702041	1.19068	0.93102
