# Supplementary material for: Bid maintains mitochondrial cristae structure and function and protects against cardiac disease in an integrative genomics study
Source: eLife. 2018 Oct 3;7:e40907. doi: 10.7554/eLife.40907 (PMC6234033; doi:10.7554/eLife.40907)
Supplement: Figure 8—source data 1. [file elife-40907-fig8-data1.xlsx]

## Sheet: Figure 8
Figure 8F	EM Quantiation Avg. Length Density (Cristae/mitochondria)				Figure 8G	EM Quantiation Avg. Area Density (Mitochondria/cell)					Figure 8H	MPC oxygen consumption (OCR)
	Cell Type (MPCs)					Cell Type (MPCs)					Cell Type (MPCs)
Image #	Bid+/+	Bid-/- + FHA-BidBH3	Bid-/- + FHA-BidBH3/M148T		Image #	Bid+/+	Bid-/- + FHA-BidBH3	Bid-/- + FHA-BidBH3/M148T		Replicates	Bid+/+	Bid -/-	Bid-/- + FHA-BidBH3	Bid-/- + FHA-BidBH3/M148T
1	0.0110681	0.031746	0.0100179		1	0.08125	0.0268456	0.245714		1	30.0252	13.1609	18.3656	8.8914
2	0.016444	0.0176367	0.0158508		2	0.076087	0.125	0.19186		2	22.8755	7.081	19.69	7.1891
3	0.0151458	0.0204082	0.0205128		3	0.246753	0.189189	0.1875		3	35.127	27.6167	37.4726	18.1418
4	0.020555	0.010582	0.0261538		4	0.106061	0.0365854	0.20202		4	34.1946	24.8	24.9074	13.8174
5	0.02494	0.020202	0.0164103		5	0.114504	0.100917	0.241935		5	16.8029	25.0753	29.9386	18.5512
6	0.115108	0.015361	0.0290598		6	0.0285714	0.316327	0.166667		6	29.0928	18.3191	33.3771
7	0.0359712	0.021164	0.0107692		7	0.109091	0.131579	0.246914		7		16.9231
8	0.0383693	0.0207039	0.0215385		8	0.0379747	0.160839	0.166667		8		18.6062
9	0.0181749	0.023088	0.0221538		9	0.180952	0.141026	0.142045		9		20.9973
10	0.00719425	0.0252101	0.00997921		10	0.336449	0.197674	0.298387		10		18.5
11	0.022446	0.00865801	0.0276923		11	0.320513	0.127907	0.102041		11		14.6
12	0.0209287	0.0250627	0.0126697		12	0.127907	0.123377	0.191011		12		13.3
13	0.028777	0.0200501	0.00904977		13	0.127273	0.136691	0.165049
14	0.0479616	0.030303	0.00586081		14	0.0895522	0.209524	0.385321
15	0.0174717	0.010582	0		15	0.337349	0.100671	0.319672
16	0.0179856	0.0117914			16	0.153846	0.225806
17	0.0235448	0.031746			17	0.15942	0.0130719
18	0.0234914	0.0198413			18	0.281609	0.164948
19	0.028777	0.02442			19	0.060241	0.0962963
20	0.0221361	0.015873			20	0.236364	0.0727273
21	0.0191847	0.0252101			21	0.12	0.201183
22	0.0232957	0.015873			22	0.181034	0.0447761
23	0.0340092	0.031746			23	0.1	0.0340909
24	0.0278487	0.026862			24	0.238461	0.149425
25	0.0143885	0.026225			25	0.0131579	0.227723
26	0.0255795	0.021164			26	0.113924	0.241071
27	0.02494	0.031746			27	0.178571	0.0127388
28	0.0175859	0.0181406			28	0.214286	0.160919
29	0.0306954	0.0168862			29	0.166667	0.382114
30	0.0274067	0.0330159			30	0.154412	0.167785
31	0.0300281	0.0185185			31	0.164286	0.173913
32	0.0143885	0.0136054			32	0.233333	0.0608696
33	0.0104644	0.0281385			33	0.11	0.382609
34	0.0125117	0.0408163			34	0.209091	0.0457516
35	0.0172662	0.017316			35	0.0510204	0.180328
36	0.0177089	0.020202			36	0.134021	0.126437
37	0.028777	0.0507937			37	0.130435	0.128205
38	0.0130805	0.00976801			38	0.166667	0.142857
39	0.0239808	0.0129336			39	0.185567	0.16875
40	0.0258001	0.0349206			40	0.208633	0.175439

## Sheet: Figure 8-figure supplement 1
Figure 8-Figure Supplement 1A						Figure 8-Figure Supplement 1B
	Viability (%) (Normalized)
Bid+/+ (MPC)	Time (hours)						% Viability (24 hour time-point)
Replicates	0	6	12	24		Replicates	Bid+/+	Bid -/-	Bid-/- + FHA-BidBH3	Bid-/- + FHA-BidBH3/M148T
1	100	91.2859	72.7949	20.1913		1	20.1913	58.6046	37.2941	46.062
2	100	105.823	99.2161	59.6865		2	59.6865	109.613	75.7211	75.2941
3	100	99.5754	93.8429	65.7113		3	65.7113	94.9721	84.4093	81.4947
4	100	91.1043	67.8274	35.5316		4	35.5316	84.1374	77.0676	72.8319
5	100	92.2865	71.3674	31.5875		5	31.5875	87.1366	84.491	80.1512
Bid-/-	Time (hours)
Replicates	0	6	12	24
1	100	101.705	84.9612	58.6046
2	100	123.243	122.095	109.613
3	100	104.693	102.57	94.9721
4	100	101.034	99.1816	84.1374
5	100	99.0055	98.0656	87.1366
Bid-/- + FHA-BidBH3	Time (hours)
Replicates	0	6	12	24
1	100	81.7647	66.7059	37.2941
2	100	103.846	97.3558	75.7211
3	100	107.065	102.192	84.4093
4	100	97.2576	97.0309	77.0676
5	100	99.3686	99.3575	84.491
Bid-/- + FHA-BidBH3/M148T	Time (hours)
Replicates	0	6	12	24
1	100	83.2936	75.4177	46.062
2	100	97.7647	96.1176	75.2941
3	100	98.3393	94.8992	81.4947
4	100	97.1128	95.2212	72.8319
5	100	94.8406	94.2491	80.1512
Figure 8-Figure Supplement 1D	MPC oxygen consumption (OCR)
	Cell Type (MPCs)
Replicates	Bid+/+	Bid -/-	Bid-/- + FHA-BidBH3	Bid-/- + FHA-BidBH3/E120D	Bid-/- + FHA-BidBH3/R124Q
1	22.2164	12.9799	26.8432	36.4485	24.6621
2	16.7798	5.8394	27.3987	33.3791	23.1614
3	18.863	19.1887	36.6019	36.4993	16.5643
4	13.1772	18.2003	24.7537	22.1104	17.2727
5	22.3287	23.74		19.1144	17.8391
6	34.64	21.13		22.6039	25.157
7	27.46	18.5
8	29.21	27.1
9	30.33	18.72
10	35.8
Figure 8-Figure Supplement 1E						Figure 8-Figure Supplement 1F
	Viability (%) (Normalized)
Bid+/+ (MPC)	Time (hours)						% Viability (24 hour time-point)
Replicates	0	6	12	24		Replicates	Bid+/+	Bid -/-	Bid-/- + FHA-BidBH3	Bid-/- + FHA-BidBH3/E120D	Bid-/- + FHA-BidBH3/R124Q
1	100	94.7799	88.3543	54.3815		1	54.3815	89.2442	87.9837	68.0902	38.285
2	100	87.1359	72.9028	28.3437		2	28.3437	82.2294	60.7994	98.8916	74.4298
3	100	83.2547	78.1346	32.3337		3	32.3337	81.6088	75.3745	90.8257	78.2708
						4				94.1138	89.1729
Bid-/-	Time (hours)					5				80.1372	86.6829
Replicates	0	6	12	24		6				80.6062	85.3303
1	100	97.292	102.034	89.2442
2	100	98.3883	97.3692	82.2294
3	100	88.7191	98.5567	81.6088
Bid-/- + FHA-BidBH3	Time (hours)
Replicates	0	6	12	24
1	100	96.4359	91.3422	87.9837
2	100	96.4625	83.531	60.7994
3	100	84.9984	87.9943	75.3745
Bid-/- + FHA-BidBH3/E120D	Time (hours)
Replicates	0	6	12	24
1	100	91.6963	86.3582	68.0902
2	100	110.468	109.113	98.8916
3	100	104.587	103.096	90.8257
4	100	96.8033	100.441	94.1138
5	100	98.5345	97.2456	80.1372
6	100	93.4903	94.5943	80.6062
Bid-/- + FHA-BidBH3/R124Q	Time (hours)
Replicates	0	6	12	24
1	100	91.1836	78.1401	38.285
2	100	108.403	99.7599	74.4298
3	100	102.844	98.6348	78.2708
4	100	95.5107	96.4297	89.1729
5	100	97.6095	99.323	86.6829
6	100	92.4079	97.5533	85.3303
