# Supplementary material for: Bid maintains mitochondrial cristae structure and function and protects against cardiac disease in an integrative genomics study
Source: eLife journal article supplement (doi:10.7554/elife.40907), 2018-10-03
Supplement: supp [file elife_poa_e40907_Figure_2_figure_supplement_1.pdf › elife_poa_e40907_Figure_2_figure_supplement_1.pdf]

**Figure 2-figure supplement 1**

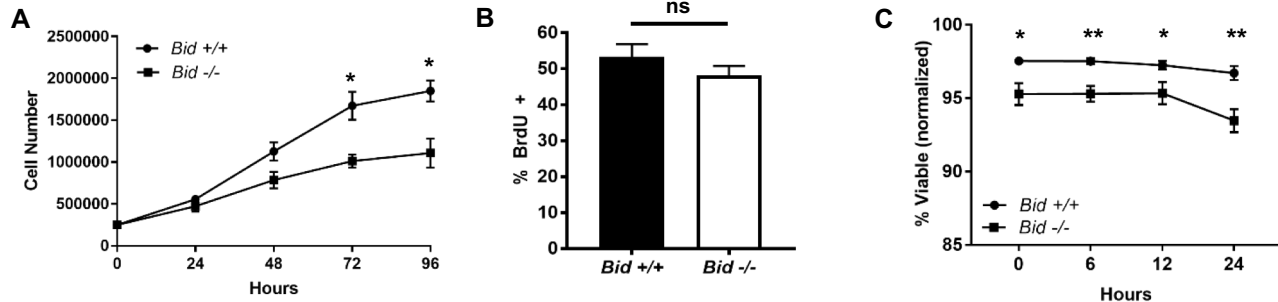

**Figure 2-figure supplement 1. Loss of Bid results in increased cell death in the absence of an apoptotic stimulus.**

**(A)** *Bid* -/- MPCs display decreased growth rates (n=4) but not proliferation rates **(B)** in complete media (n=3). **(C)** Viability assay of *Bid* +/+ and *Bid* -/- cells in complete media (n=7). Data were normalized to no treatment. P-values were determined by unpaired Student's t-test for **A-C**. Error bars indicate +/- SEM for all data. ns=not significant, \*p<0.05 and \*\*p<0.01.
