# Supplementary material for: Bid maintains mitochondrial cristae structure and function and protects against cardiac disease in an integrative genomics study
Source: eLife journal article supplement (doi:10.7554/elife.40907), 2018-10-03
Supplement: supp [file elife_poa_e40907_Figure_2_figure_supplement_2.pdf › elife_poa_e40907_Figure_2_figure_supplement_2.pdf]

Figure 2 –figure supplement 2

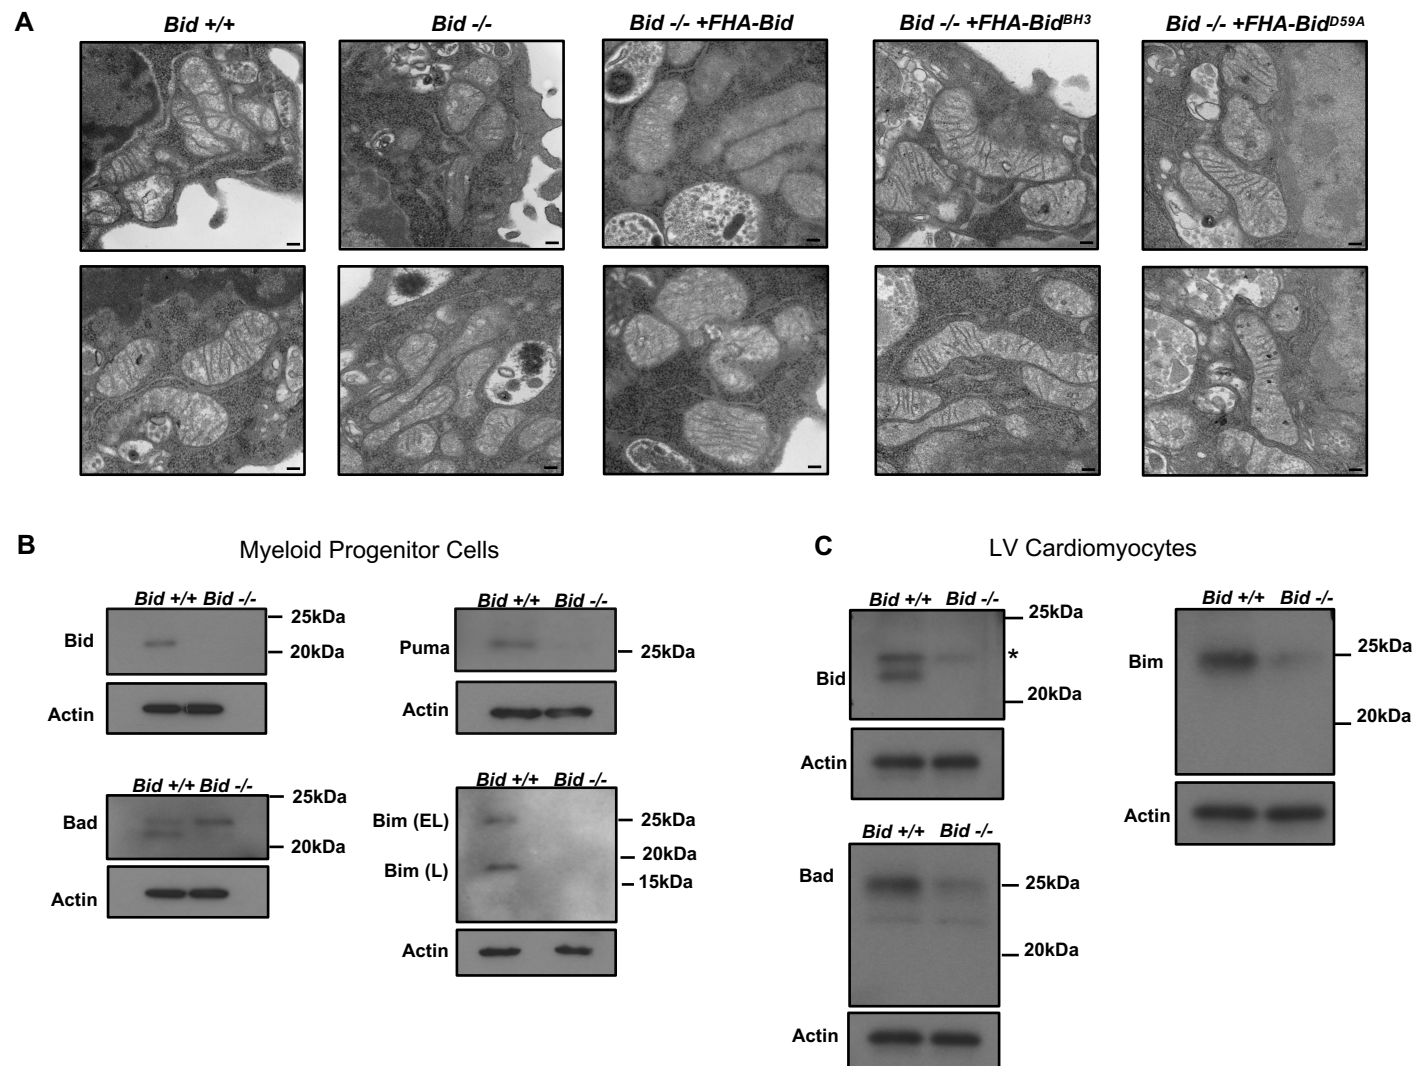

**Figure 2-figure supplement 2. Loss of Bid results in a mitochondrial structural defect not compensated for by upregulation of Bad, Puma, or Bim.**

(A) Transmission electron microscopy images of the indicated MPC cell lines. Images were taken at 67,000X, scale bar =100 nm. (B) Western analysis of BH3-only proteins including Bad, Puma, and Bim from *Bid*  $+/+$  and *Bid*  $-/-$  MPCs or (C) LV Cardiomyocytes. Loss of Bid does not lead to a compensatory increase in expression of these apoptotic proteins. \* indicates cross reacting band
