# Supplementary material for: Bid maintains mitochondrial cristae structure and function and protects against cardiac disease in an integrative genomics study
Source: eLife journal article supplement (doi:10.7554/elife.40907), 2018-10-03
Supplement: supp [file elife_poa_e40907_Figure_4_figure_supplement_1.pdf › elife_poa_e40907_Figure_4_figure_supplement_1.pdf]

**Figure 4-figure supplement 3**

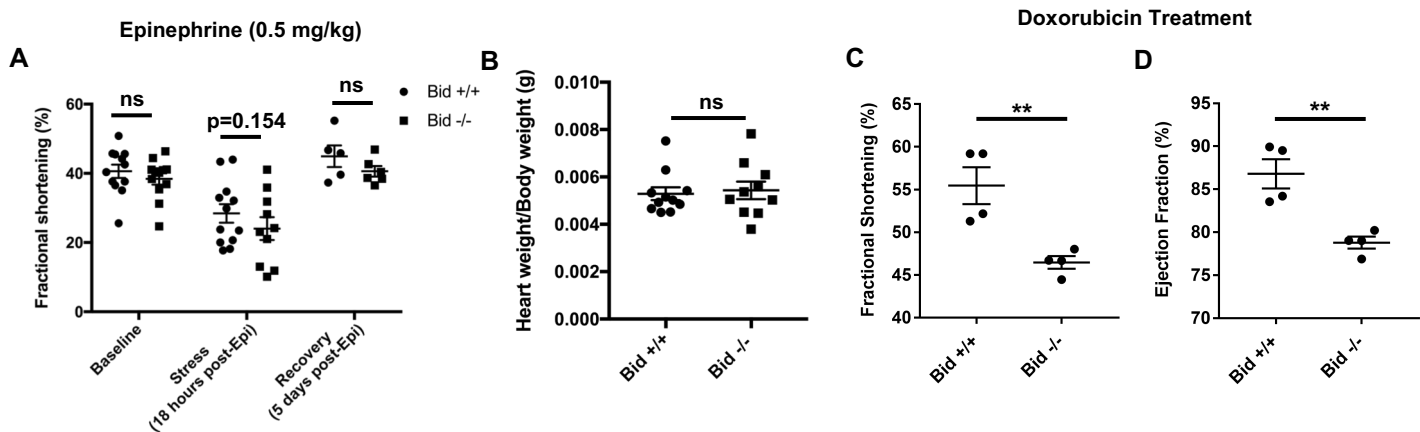

**Figure 4-figure supplement 3. *Bid*<sup>-/-</sup> mice have decreased FS and EF with chronic Doxorubicin.**

(A) Fractional shortening (%) from mice corresponding to Figure 4. (B) Heart weight to body weight ratio from mice in Figure 4. (C) Fractional shortening (%) from *Bid*<sup>+/+</sup> and *Bid*<sup>-/-</sup> mice after 3 doses of 7.5 mg/kg of Doxorubicin every 5 days (n=4 mice per group). (D) Ejection fraction (%) of Doxorubicin treated mice as in C. Measurements for FS and EF were made in at least duplicate using the LV trace function using the Visual Sonics Software ver2.2. P-values were determined by two-way ANOVA with unpaired Student's t-test A and unpaired Student's t-test B-D. Error bars indicate +/- SEM for all data. ns=not significant, \* p < 0.05, \*\*p < 0.01
