# Supplementary material for: Bid maintains mitochondrial cristae structure and function and protects against cardiac disease in an integrative genomics study
Source: eLife journal article supplement (doi:10.7554/elife.40907), 2018-10-03
Supplement: supp [file elife_poa_e40907_Figure_6_figure_supplement_1.pdf › elife_poa_e40907_Figure_6_figure_supplement_1.pdf]

**Figure 6-figure supplement 4**

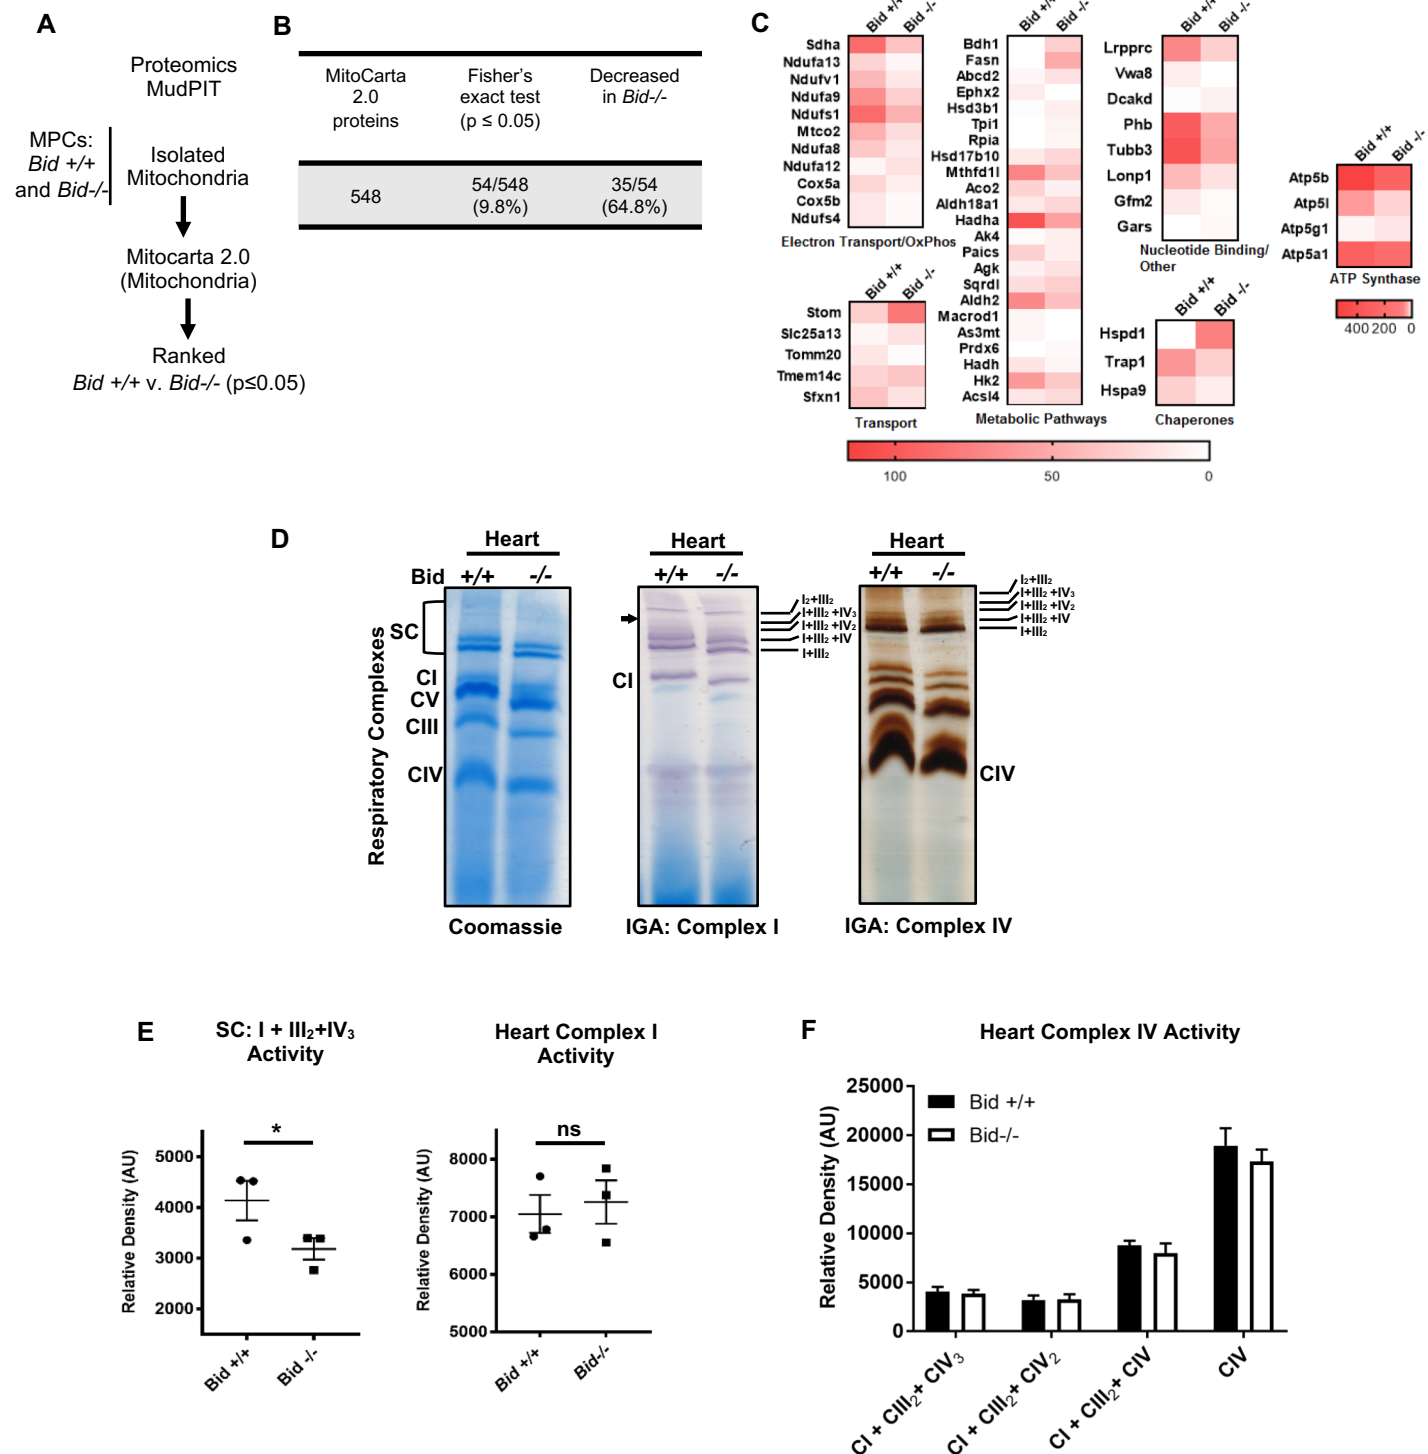

**Figure 6-figure supplement 4. *Bid* <sup>-/-</sup> MPC mitochondria have a decreased CI proteins and decreased activity, but no difference in CIV activity.**

(A) MudPIT analysis workflow on isolated MPC mitochondria. (B) Summary of results revealing 54 significantly different mitochondrial proteins different by Fisher's exact test ( $p < 0.05$ ). (C) Heat map highlights spectral count differences between identified cristae-related proteins. Scale indicates no spectral counts (white) to high spectral counts (red). (D) Representative Coomassie stained gradient native gel of equivalent amounts of *Bid* <sup>+/+</sup> and *Bid* <sup>-/-</sup> heart mitochondria protein (left), in-gel activity (IGA) assay for Complex I (middle, arrow denotes significantly different complex activity), and in-gel activity for Complex IV (right). CI=Complex I, CIII = Complex III, CIV= Complex IV, CV=Complex V, and SC=supercomplexes. (E) Quantitation of in-gel activity assay for CI respiratory complexes in *Bid* <sup>+/+</sup> and *Bid* <sup>-/-</sup> hearts, arbitrary units,  $n=3$  per gel (representative of 4 independent runs). (F) Quantitation of in-gel activity assay for all CIV respiratory complexes in *Bid* <sup>+/+</sup> and *Bid* <sup>-/-</sup> hearts, arbitrary units,  $n=3$  per gel. P-values were determined by unpaired Student's t-test for E. Error bars indicate  $\pm$  SEM for all data. ns=not significant, \*  $p < 0.05$
