# Supplementary material for: Bid maintains mitochondrial cristae structure and function and protects against cardiac disease in an integrative genomics study
Source: eLife journal article supplement (doi:10.7554/elife.40907), 2018-10-03
Supplement: supp [file elife_poa_e40907_Figure_6_figure_supplement_2.pdf › elife_poa_e40907_Figure_6_figure_supplement_2.pdf]

**Figure 6-figure supplement 5**

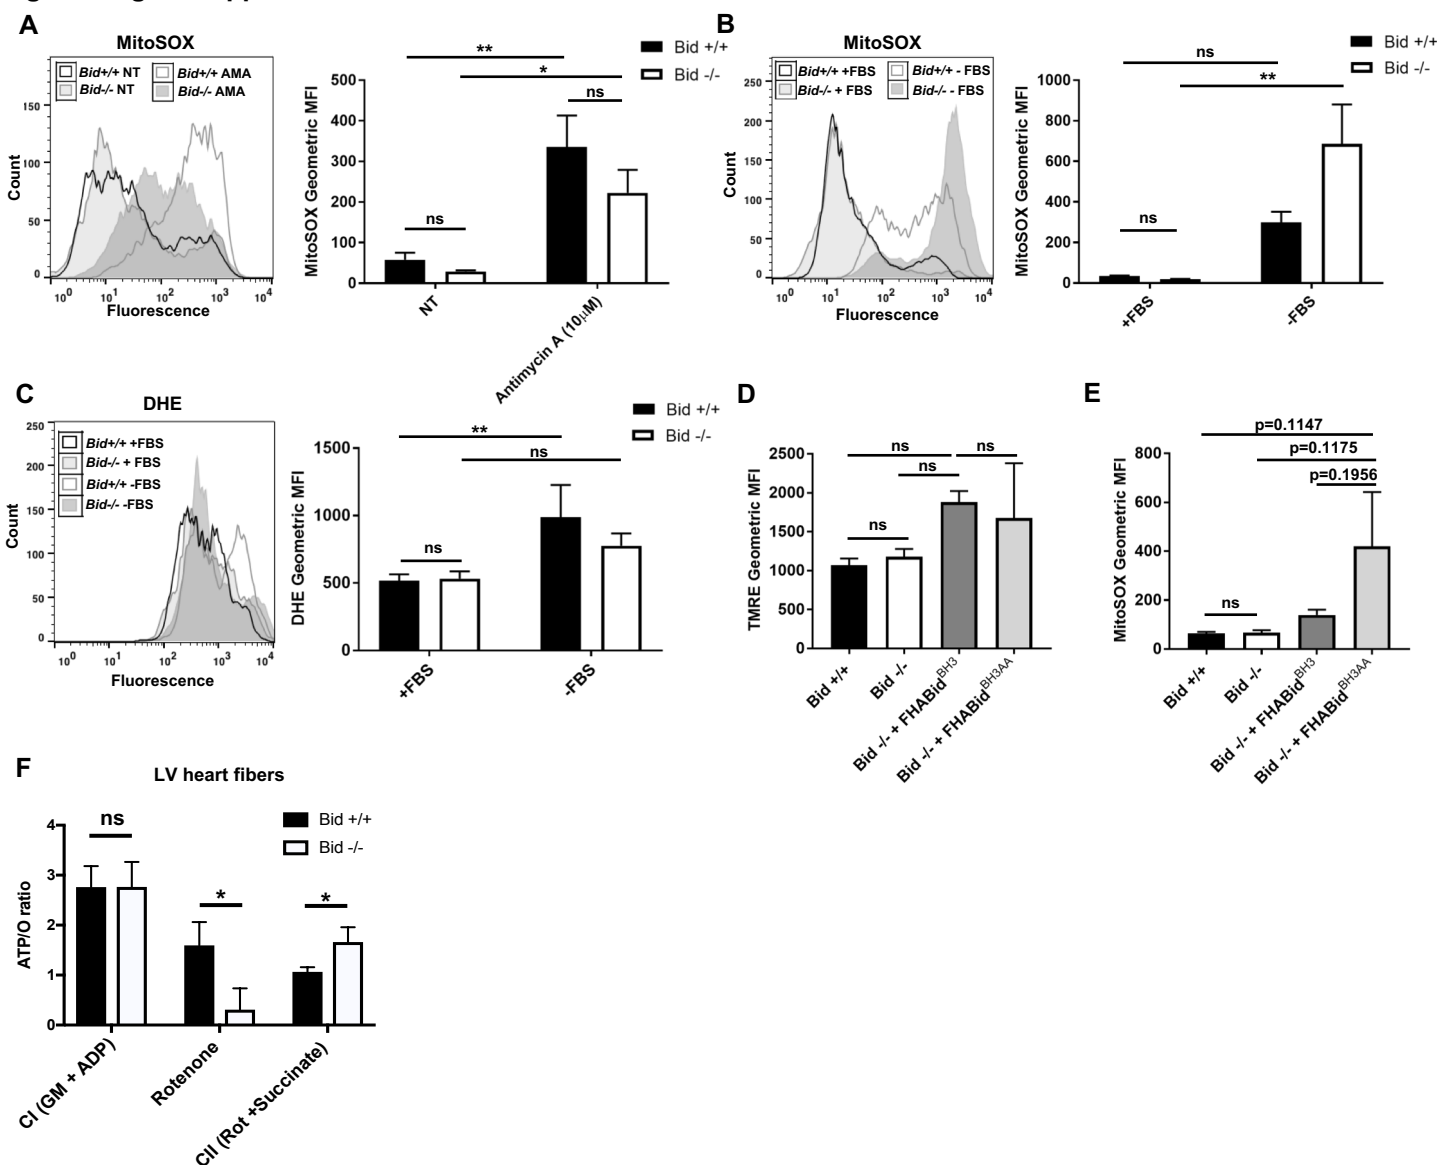

**Figure 6-figure supplement 5. *Bid*<sup>-/-</sup> MPCs maintain their membrane potential and do not generate increased ROS**

(A) *Bid*<sup>+/+</sup> and *Bid*<sup>-/-</sup> MPCs were cultured for 24 hours in complete media (no treatment=NT) or treated with 10 μM Antimycin A (AMA) as a positive control for the last two hours followed by staining with 2 μM MitoSOX for mitochondrial ROS. Data are represented as geometric mean fluorescence intensity (MFI). NT n=7,6 and AMA n=6,6 for *Bid*<sup>+/+</sup> and *Bid*<sup>-/-</sup>, respectively. (B) *Bid*<sup>+/+</sup> and *Bid*<sup>-/-</sup> MPCs were subjected to serum withdrawal for 24 hours and stained with MitoSOX. n=4,4 for *Bid*<sup>+/+</sup> and *Bid*<sup>-/-</sup> with and without FBS. (C) Treatment as in B followed by staining with 5 μM of DHE for cellular ROS. n=11,10 with FBS and n=4,4 without FBS for *Bid*<sup>+/+</sup> and *Bid*<sup>-/-</sup>, respectively. (D) Mitochondrial membrane potential assessed with 50nM TMRE in *Bid*<sup>+/+</sup>, *Bid*<sup>-/-</sup>, *Bid*<sup>-/-</sup> + FHA-Bid<sup>BH3</sup> and *Bid*<sup>-/-</sup> + FHA-Bid<sup>BH3AA</sup> MPCs, n=4,4,4,3 respectively. Cells overexpressing BH3- or BH3AA-mutanted Bid were gated on CD25 high expressing cells (i.e. only cells containing FHA-Bid). (E) Mitochondrial ROS of the indicated cell lines measured with MitoSOX as in D, n=4,4,4,3 respectively. (F) ATP/O ratio determined from data shown in Figure 6E and F. P-values were determined by two-way ANOVA (p<0.001) with Tukey's post test for A-C, one-way ANOVA (not significant) with Student's t-test D, E, and two-way ANOVA with unpaired Student's t-test for F. Error bars indicate +/- SEM for all data. ns=not significant, \* p<0.05, \*\*p<0.01
