# Supplementary material for: Bid maintains mitochondrial cristae structure and function and protects against cardiac disease in an integrative genomics study
Source: eLife journal article supplement (doi:10.7554/elife.40907), 2018-10-03
Supplement: supp [file elife_poa_e40907_Figure_7_figure_supplement_1.pdf › elife_poa_e40907_Figure_7_figure_supplement_1.pdf]

Figure 7-figure supplement 6

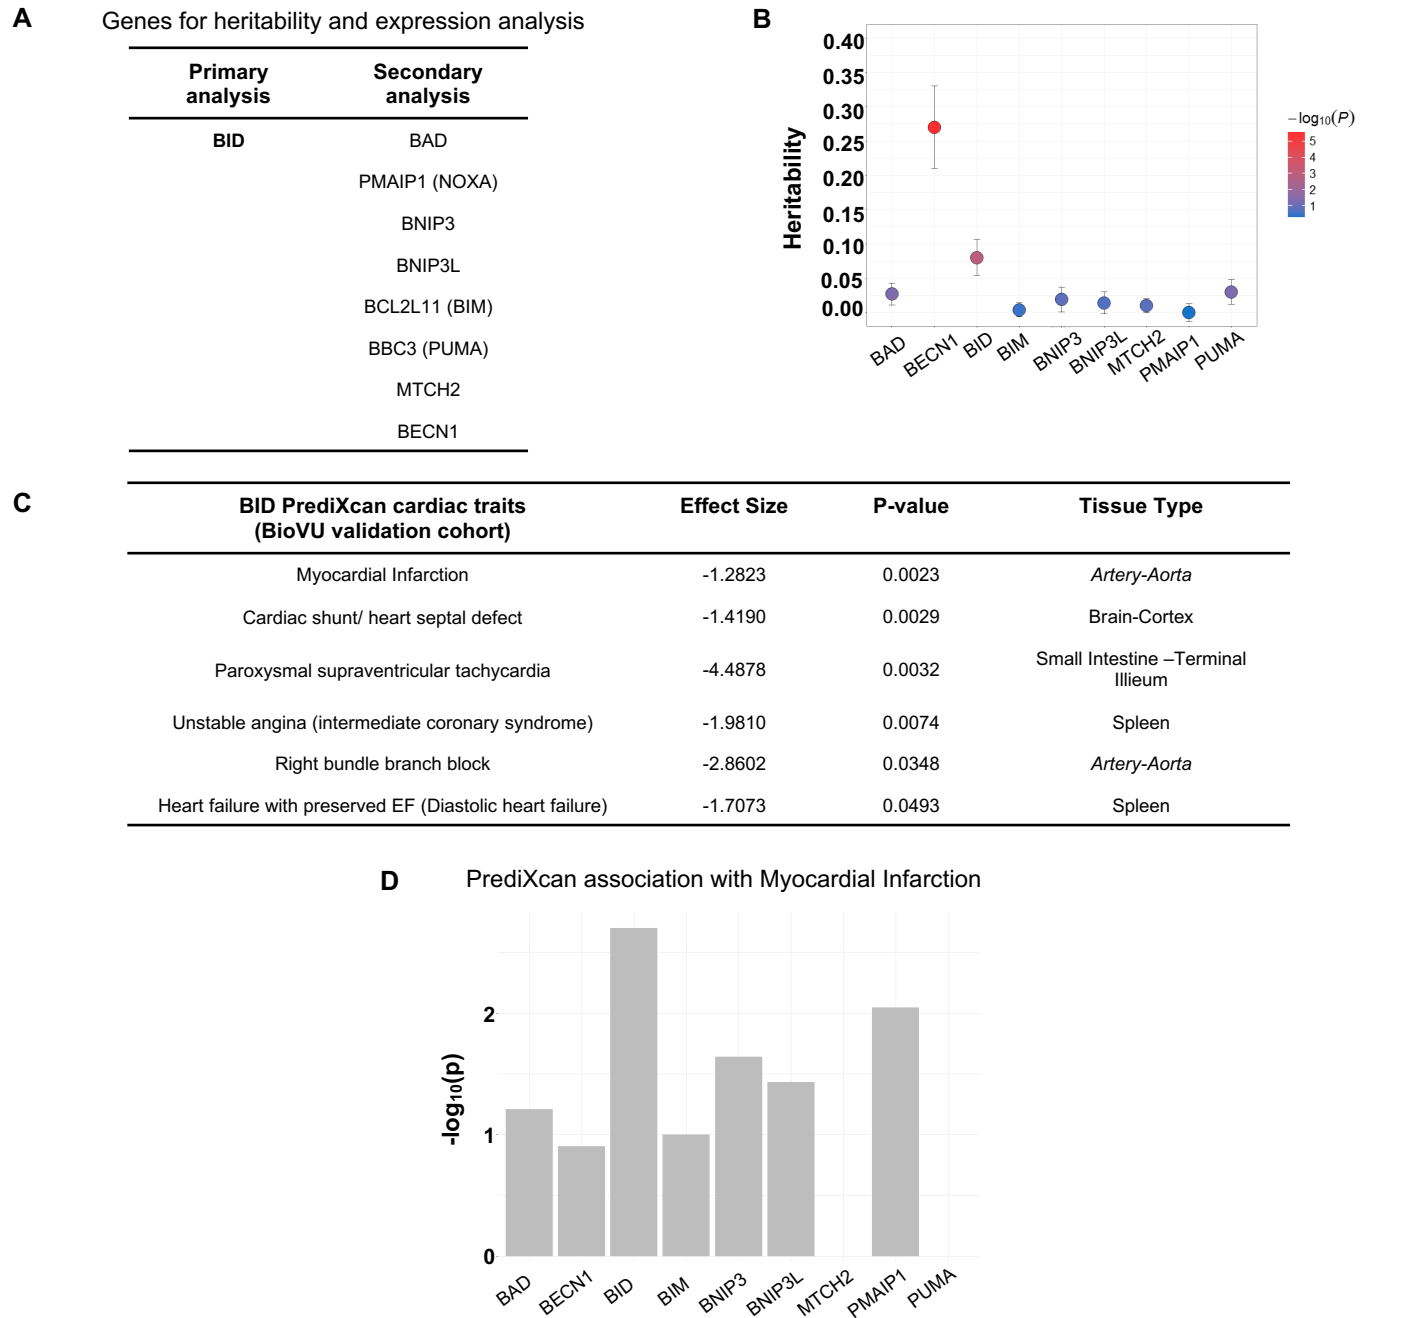

**Figure 7-figure supplement 6. BID and BECN1 are significantly heritable and PrediXcan reveals significantly decreased BID expression for cardiac traits.**

(A) Table of genes used for heritability and expression analysis. BID was analyzed in a primary analysis while all other genes encompassed a secondary analysis. (B) Heritability analysis for all indicated genes. Only BECN1 and BID were found to be significantly heritable. (C) Table of BID traits with associated p-values, effect size, and tissue type for all significant traits. Cardiac traits that appeared more than once were represented in the graph by the most significant p-value. (D) PrediXcan analysis results for gene expression and association with MI in BID and secondary analysis of all other genes.
