# Supplementary material for: Bid maintains mitochondrial cristae structure and function and protects against cardiac disease in an integrative genomics study
Source: eLife journal article supplement (doi:10.7554/elife.40907), 2018-10-03
Supplement: supp [file elife_poa_e40907_Figure_7_figure_supplement_2.pdf › elife_poa_e40907_Figure_7_figure_supplement_2.pdf]

**Figure 7-figure supplement 7**

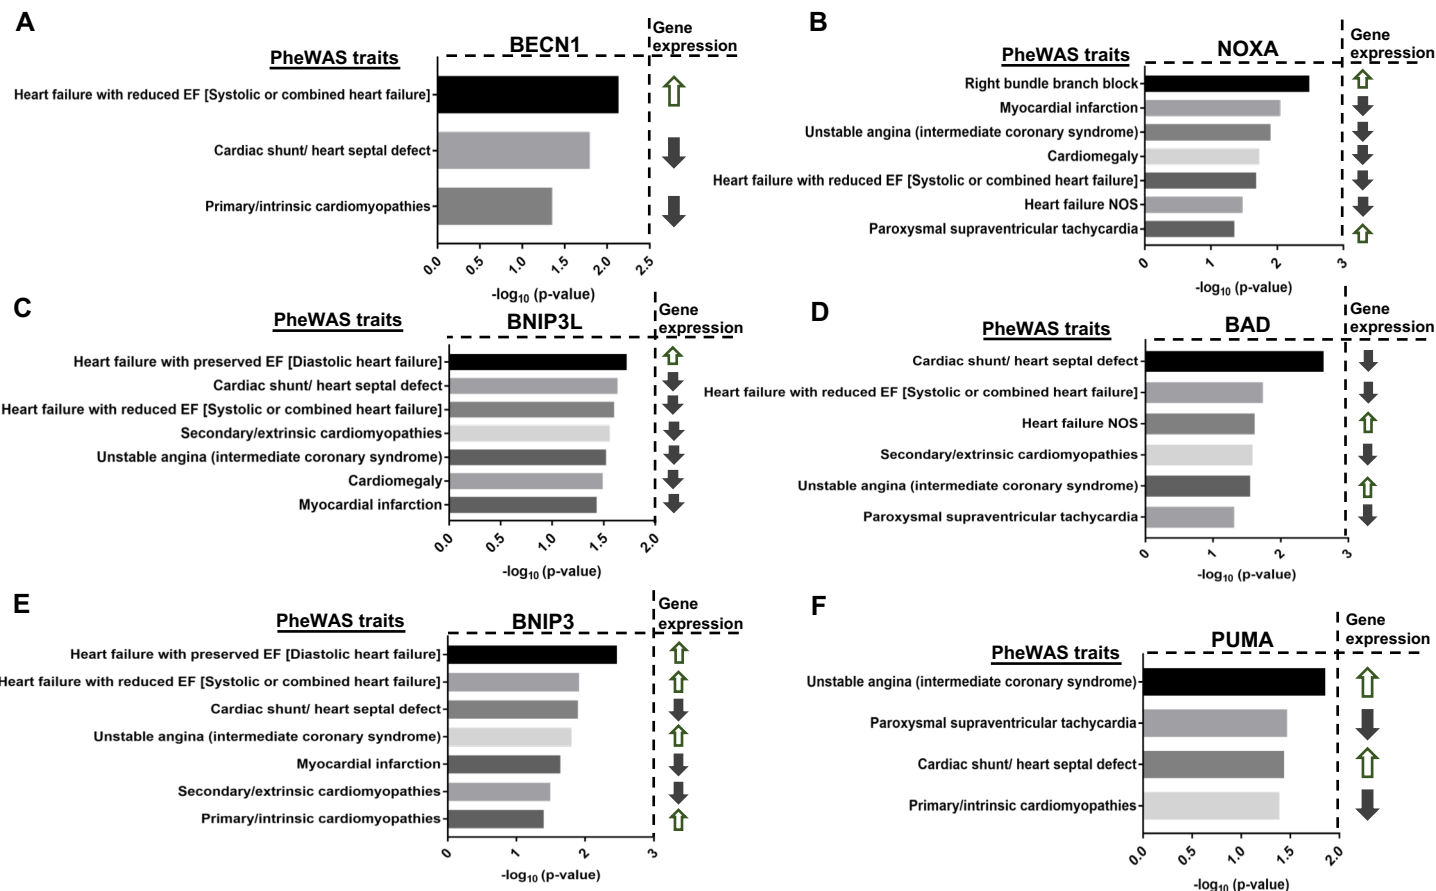

**Figure 7-figure supplement 7. Secondary PrediXcan analysis of BH3-only Bcl-2 family genes shows discordant direction of effect with heart conditions.**

(A-F) Graphs of significant cardiac traits in the BioVU validation cohort ranked by p-values ( $-\log_{10}$ ) for BECN1, NOXA, BNIP3L, BAD, BNIP3, and PUMA and the corresponding direction of gene expression. For all genes, cardiac traits that appeared more than once were represented in the graph by the most significant p-value. P-values were determined by logistic regression with disease status as response variable and imputed gene expression as predictor.
