# Supplementary material for: Bid maintains mitochondrial cristae structure and function and protects against cardiac disease in an integrative genomics study
Source: eLife journal article supplement (doi:10.7554/elife.40907), 2018-10-03
Supplement: supp [file elife_poa_e40907_Figure_7_figure_supplement_3.pdf › elife_poa_e40907_Figure_7_figure_supplement_3.pdf]

**Figure 7-figure supplement 8**

**A**

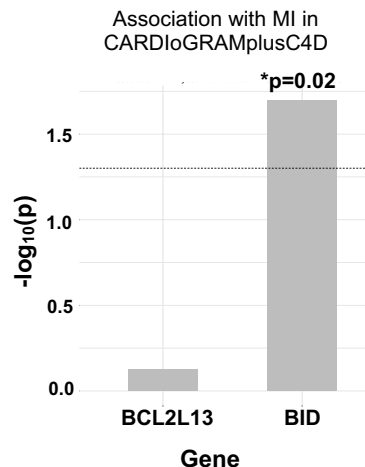

**B**

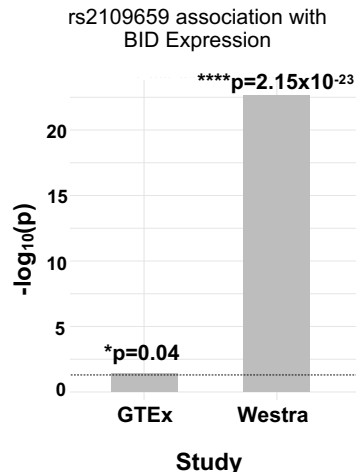

**C**

S-PrediXcan of UK Biobank  
BID association with MI

| Z-score | P-value | Tissue Type      |
|---------|---------|------------------|
| -2.37   | 0.018   | Skin             |
| -2.26   | 0.024   | Nerve-Tibial     |
| -2.01   | 0.045   | Brain-cerebellum |

**Figure 7-figure supplement 8. Decreased BID expression is associated with MI in two additional independent cohorts.**

**(A)** PrediXcan analysis in CARDIoGRAMplus C4D for association of BCL2L13 and BID with MI in. ( $p=0.02$ , effect size=-0.06, SE=0.026). **(B)** Association of SNP rs2109659 with BID gene expression in GTEx ( $n=114$  lymphoblastoid cells,  $p=0.04$ , z-score=-2.05, effect allele=C) and Westra data sets ( $n=5,311$  peripheral blood samples,  $p=2.15 \times 10^{-23}$ , z-score=-9.97, effect allele=C). **(C)** S-PrediXcan analysis of a UK Biobank of greater than 430,000 people reveals significantly decreased BID gene expression associated with MI. P-values were determined by logistic regression with disease status as response variable and imputed gene expression as predictor.
