# Supplementary material for: Bid maintains mitochondrial cristae structure and function and protects against cardiac disease in an integrative genomics study
Source: eLife journal article supplement (doi:10.7554/elife.40907), 2018-10-03
Supplement: supp [file elife_poa_e40907_Figure_8_figure_supplement_1.pdf › elife_poa_e40907_Figure_8_figure_supplement_1.pdf]

**Figure 8-figure supplement 9**

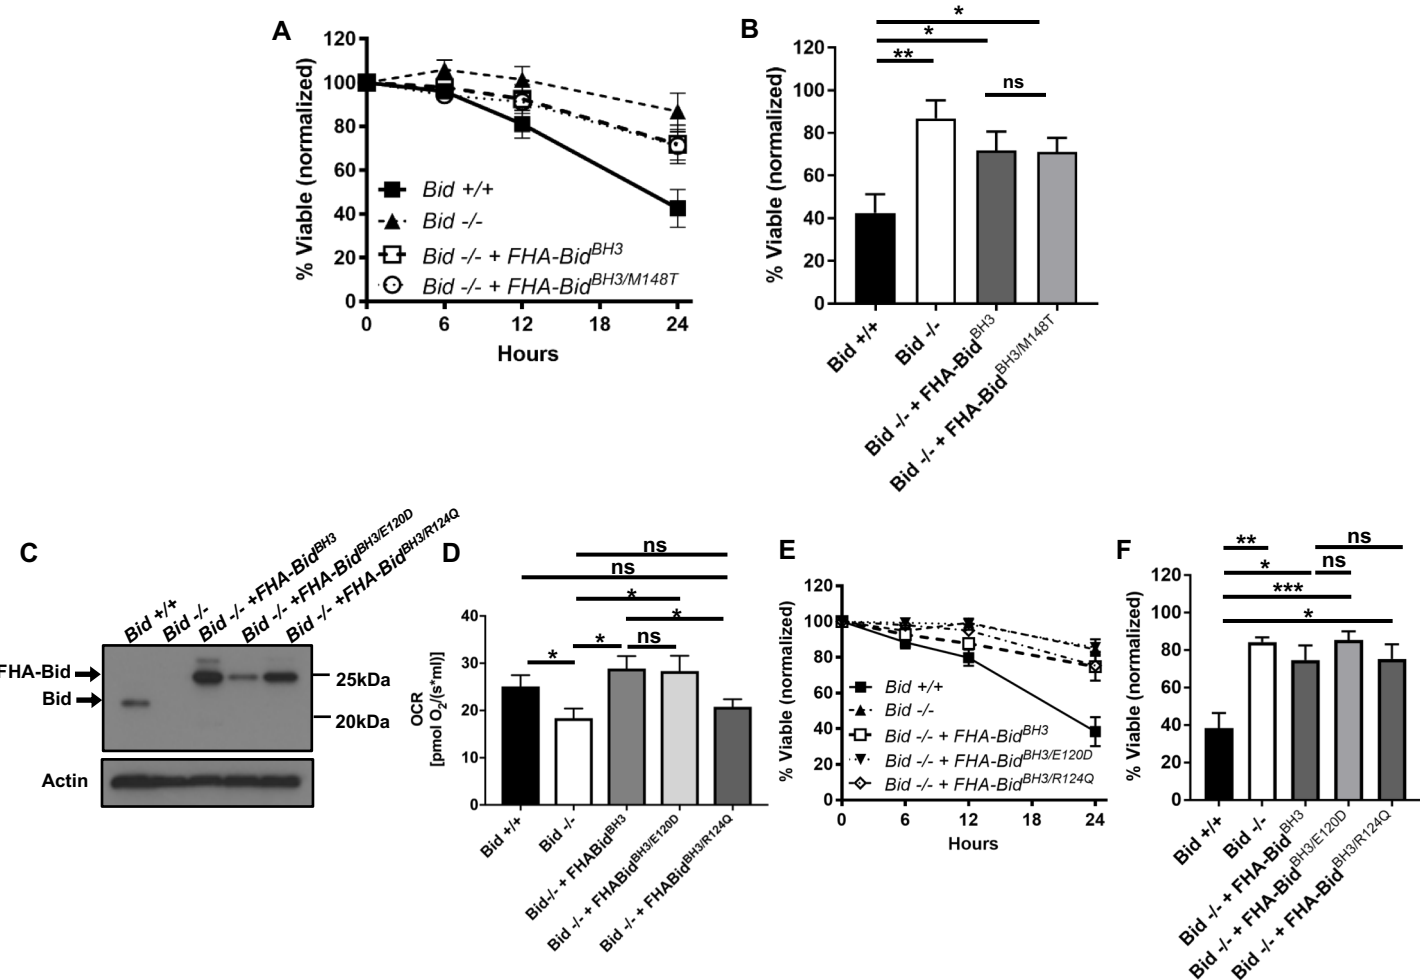

**Figure 8-figure supplement 9. Mutations in Bid corresponding to Helix-5 SNPs show less impact on respiration than Helix-6 mutation M148T.**

**(A)** Viability assay (AV/PI) for indicated cell lines corresponding to Figure 8 and **(B)** the 24 hour time-point (n=5). **(C)** Western blot of expression levels of Bid for the indicated genotypes. **(D)** OCR of *Bid*<sup>-/-</sup>, *Bid*<sup>-/-</sup> + *FHABid*<sup>BH3</sup>, *Bid*<sup>-/-</sup> + *FHABid*<sup>BH3/E120D</sup>, and *Bid*<sup>-/-</sup> + *FHABid*<sup>BH3/R124Q</sup> MPCs for all cell lines (n=10,9,4,6,6 respectively). **(E)** Viability assay (AV/PI) of MPCs for indicated times following TNF-α/Actinomycin D treatment and **(F)** 24-hour timepoint (n=3,3,3,6,6 respectively). The percent of viable cells was normalized to no treatment. P-values were determined by one-way ANOVA (p<0.05) with Student's t-test for **B**, **D**, and **F**. Error bars indicate +/-SEM for all data. ns=not significant, \* p<0.05, \*\* p<0.01, \*\*\*p<0.001
