# Supplementary material for: Bid maintains mitochondrial cristae structure and function and protects against cardiac disease in an integrative genomics study
Source: eLife journal article supplement (doi:10.7554/elife.40907), 2018-10-03
Supplement: supp [file elife_poa_e40907_Figure_9_figure_supplement_1.pdf › elife_poa_e40907_Figure_9_figure_supplement_1.pdf]

**Figure 9-figure supplement 10**

Genes associated with cristae structure

| Gene name | Full name                                               | Entrez Gene ID |
|-----------|---------------------------------------------------------|----------------|
| OPA1      | Optic atrophy 1                                         | 4976           |
| MCL1*     | Induced myeloid leukemia cell differentiation protein   | 4170           |
| IMMT      | MICOS complex subunit Mic60                             | 10989          |
| CHCHD3    | MICOS complex subunit Mic19                             | 54927          |
| CHCHD6    | MICOS complex subunit Mic25                             | 84303          |
| MINOS1    | MICOS complex subunit Mic10                             | 440574         |
| MIC13     | MICOS complex subunit Mic13                             | 7899621        |
| APOO      | MICOS complex subunit Mic26                             | 79135          |
| APOOL     | MICOS complex subunit Mic27                             | 139322         |
| GHITM     | Growth hormone-inducible transmembrane protein          | 27069          |
| SAM50     | Sorting and assembly machinery component 50 homolog     | 855705         |
| MTX1*     | Metaxin-1                                               | 4580           |
| MTX2      | Metaxin-2                                               | 10651          |
| DNAJC11   | DnaJ homolog subfamily C member 11                      | 55735          |
| TMEM11    | Transmembrane protein 11                                | 8834           |
| HSPA9*    | Stress 70 protein                                       | 3313           |
| HSPA1A    | Heat shock 70 kDa protein 1A                            | 3303           |
| HSPA1B    | Heat shock 70 kDa protein 1B                            | 3304           |
| PHB*      | Prohibitin                                              | 5245           |
| PHB2      | Prohibitin-2                                            | 11331          |
| STOML2    | Stomatin-like protein 2                                 | 30968          |
| ATP5F1A*  | ATP synthase F1 subunit alpha                           | 498            |
| ATP5F1B*  | ATP synthase F1 subunit beta                            | 506            |
| ATP5F1C   | ATP synthase F1 subunit gamma                           | 509            |
| ATP5F1D   | ATP synthase F1 subunit delta                           | 513            |
| ATP5F1E   | ATP synthase F1 subunit epsilon                         | 514            |
| ATP5MC1*  | ATP synthase membrane subunit c locus 1                 | 516            |
| ATP5MC2   | ATP synthase membrane subunit c locus 2                 | 517            |
| ATP5MC3   | ATP synthase membrane subunit c locus 3                 | 518            |
| ATP5MD    | ATP synthase membrane subunit DAPIT                     | 84833          |
| ATP5ME    | ATP synthase membrane subunit e                         | 521            |
| ATP5MF    | ATP synthase membrane subunit f                         | 9551           |
| ATP5MG*   | ATP synthase membrane subunit g                         | 10632          |
| ATP5MPL   | ATP synthase membrane subunit 6.8PL                     | 9556           |
| MT-ATP6   | mitochondrially encoded ATP synthase membrane subunit 6 | 4508           |
| MT-ATP8   | mitochondrially encoded ATP synthase membrane subunit 8 | 4509           |
| ATP5PB    | ATP synthase peripheral stalk-membrane subunit b        | 515            |
| ATP5PD    | ATP synthase peripheral stalk subunit d                 | 10476          |
| ATP5PF    | ATP synthase peripheral stalk subunit F6                | 522            |
| ATP5PO    | ATP synthase peripheral stalk subunit OSCP              | 539            |
| ATP5IF1   | ATP synthase inhibitory factor subunit 1                | 93974          |

+ Gene identified by PrediXcan to have significantly decreased expression associated with MI

\* Gene name associated with proteins identified by MudPIT to be significantly different between WT and *Bid*<sup>-/-</sup> MPC mitochondria (see Figure 5-figure supplement 4)

**Figure 9-figure supplement 10. Table of cristae structure associated genes analyzed by PrediXcan.**

A total of 41 genes with known associations to cristae structure. Genes are identified by their names and unique Entrez Gene ID.
